1 **Is hatchery stocking useful? lessons from Japan**

2

3 Shuichi Kitada

4

5 Tokyo University of Marine Science and Technology, Tokyo 108-8477, Japan.

6 E-mail: [kitada@kaiyodai.ac.jp](mailto:kitada@kaiyodai.ac.jp)

7 Telephone: +81-297-45-5267

8

9 Short running title: Impacts of hatchery stocking

10 **Abstract**

11 More than 26 billion juveniles of 180 marine species are released annually into the wild in  
12 over 20 countries, but the usefulness of this strategy remains unclear. Here, I analyse the  
13 effects of stocking by Japanese marine and salmon stock-enhancement programmes and  
14 evaluate their efficacy through a novel Bayesian meta-analysis of new and previously  
15 considered cases. The posterior mean recapture rate ( $\pm$  SD) was  $8.3 \pm 4.7\%$ . Without  
16 considering personnel costs and negative impacts on wild populations, the mean economic  
17 efficiency was  $2.8 \pm 6.1$ , with many cases having values of 1 to 2. On the macro-scale, the  
18 proportion of released seeds to total catch was  $76 \pm 20\%$  for Japanese scallop,  $28 \pm 10\%$  for  
19 abalone,  $20 \pm 5\%$  for swimming crab,  $13 \pm 5\%$  for kuruma prawn,  $11 \pm 4\%$  for Japanese  
20 flounder, and  $7 \pm 2\%$  for red sea bream; according to these percentages, stocking effects were  
21 generally small, and population dynamics were unaffected by releases but dependent on the  
22 carrying capacity of the nursery habitat. All cases of Japanese hatchery releases, except for  
23 Japanese scallop, were economically unprofitable. Captive breeding reduces the fitness of  
24 hatchery fish in the wild. In addition, long-term hatchery releases replace wild genes and  
25 cause fitness decline in the recipient population when the proportion of hatchery fish is very  
26 high. Short-term hatchery stocking can be useful, particularly for conservation purposes, but  
27 large-scale programmes harm the sustainability of populations. Nursery habitat recovery and  
28 fishing pressure reduction outperform hatcheries in the long run.

29

30 **Keywords:** Bayesian meta-analysis, ecological impacts, genetic impacts, marine stock  
31 enhancement, sea ranching, stocking effects

## 32 **Introduction**

33 The history of stocking fish larvae dates back to the 1870s (Blaxter 2000; Svåsand et al. 2000;  
34 Bell et al. 2005). Approximately 150 years later, seed production technology has progressed,  
35 and the release of hatchery-reared animals into the wild is now a popular fisheries, forestry,  
36 and wildlife management tool (Laikre et al. 2010; Taylor et al. 2017). More than 26 billion  
37 juveniles of 180 marine species, including salmonids, are released into the wild every year in  
38 more than 20 countries (Kitada 2018). Moreover, marine ranching is rapidly growing in China  
39 (Lee & Zhang 2018; Wang et al. 2018; Zhou et al. 2019) and Korea (Lee & Rahman 2018).  
40 Despite the huge number of seeds released every year, most studies have been conducted only  
41 at the experimental stage (Taylor et al. 2017). In a previous study evaluating the economic  
42 performance of 14 cases involving 12 species worldwide, most cases were found to be  
43 economically unprofitable because of the high cost of seed production compared with  
44 prevailing market prices (Kitada 2018). Empirical studies are still too limited, however, to  
45 determine the full effectiveness of hatchery-release efforts (Laikre et al. 2010), and basic  
46 questions, namely, “Do hatcheries produce extra fish for harvest, or do they simply replace  
47 natural fish with hatchery fish?” and “Are hatcheries cost-effective for producing fish?” have  
48 seldom been answered (Waples 1999). More empirical studies are thus obviously needed to  
49 settle the controversy of whether hatchery stocking is useful or harmful (Hilborn 1992;  
50 Blaxter 2000; Svåsand et al. 2000; Naish et al. 2007; Araki & Schmid 2010; Laikre et al.  
51 2010).

52

53 The feasibility and risks of hatchery stocking cannot be tested solely by examining pilot-scale  
54 releases—full-scale releases must be considered (Hilborn 2004). Despite this principle, most  
55 marine stocking programmes worldwide are in pilot-scales and test enhancement scenarios  
56 and release strategies (Taylor et al. 2017). Among the world’s countries, Japan is exceptional,

57 having released the largest number of marine and salmonid species, often on a large scale.  
58 Focused and in-depth analyses of Japanese full-scale releases can thus provide the best  
59 information for improving understanding of the positive and negative effects of marine stock  
60 enhancement and sea ranching programmes.

61

62 In regard to Japanese marine stock enhancement and sea ranching programmes, several  
63 reviews have focused on the effects of stocking several fishes (Masuda & Tsukamoto 1998;  
64 Kitada 1999; Kitada & Kishino 2006), kuruma prawn (Hamasaki & Kitada 2006, 2013),  
65 abalone (Hamasaki & Kitada 2008a), and decapod crustaceans (Hamasaki & Kitada 2008b;  
66 Hamasaki et al. 2011). Attention has also been directed towards seed production (Fushimi  
67 2001; Takeuchi 2001; Le Vay et al. 2007), seed quality and behaviour (Tsukamoto et al. 1999),  
68 broodstock management (Taniguchi 2003, 2004), and genetic effects on wild populations  
69 (Kitada et al. 2009). Reviews on salmonids have covered large-scale hatchery releases, mainly  
70 focusing on chum salmon and pink salmon; however, their emphasis was mainly on ecology,  
71 with stocking effects not fully evaluated (e.g., Kaeriyama 1999; Morita et al. 2006;  
72 Kaeriyama et al. 2012; Nagata et al. 2012; Miyakoshi et al. 2013; Kitada 2014; Morita 2014).  
73 My previous systematic review provided a perspective on economic, ecological, and genetic  
74 effects of marine stock enhancement and sea ranching programmes worldwide, including  
75 salmon (Kitada 2018), but its focus was global. No integrated review evaluating the results of  
76 both marine and salmonid stock enhancement in Japan has yet appeared.

77

78 Here, I first outline the history and present status of Japanese salmon and marine hatchery  
79 programmes. Second, I evaluate the stocking effects of major full-scale projects using a novel  
80 Bayesian meta-analysis, with new cases added to those of the previous study. Third, I predict  
81 changes in the contribution of hatchery releases to commercial catches of representative

82 species on a macro-scale. Finally, I summarize the consequences of the world's largest  
83 hatchery stocking programmes—namely, those of red sea bream in Kagoshima Bay (run for  
84 45 years), Japanese scallop (50 years), and chum salmon (more than 100 years). The results  
85 obtained here should benefit future fisheries management and conservation practices  
86 worldwide.

87

## 88 **Marine and salmonid enhancement programmes in Japan**

### 89 **Hatcheries and seed release**

90 Japan's marine stock-enhancement programme was initiated by the Fishery Agency in 1963.  
91 At that time, Japan aimed to become a fully developed country under its national  
92 industrialization policy. Many Japanese coastlines were reclaimed, mainly up until the 1970s  
93 (Fig. 1), and separate coastal industrial zones were created; thereafter, many coastal fishers  
94 moved to cities to earn higher incomes, and coastal fisheries failed to grow. The marine  
95 stock-enhancement programme was a mitigation policy designed to improve degraded  
96 habitats and thereby enhance coastal fisheries. Salmon hatcheries have a much longer history  
97 in Japan; they were begun in the 1880s to increase fishery production of returning chum  
98 salmon and have continued for over 130 years (Miyakoshi et al. 2013). As shown later,  
99 however, chum salmon stock enhancement failed during the early 1960s. Japan's marine  
100 stock-enhancement programme was therefore started with no successful case precedent. This  
101 situation was exactly the same as that described by Hilborn (1992), who said: "Many believe  
102 that the future of fisheries lies with artificial propagation. Indeed, throughout the world most  
103 management agencies seem to be relying on some form of artificial propagation to rebuild  
104 fish stocks that are depleted due to poor fisheries management or poor habitat management."  
105  
106 To obtain a bird's-eye view of stocking activity, I first created maps of salmon and marine

107 hatcheries. Approximate locations of salmon hatcheries were plotted on a map of Japan using  
108 15 regional maps of salmon hatchery locations obtained from the website of the Japan  
109 Fisheries Research and Education Agency (FRA, [salmon.fra.affrc.go.jp](http://salmon.fra.affrc.go.jp)). I identified 262  
110 salmon hatcheries in 11 prefectures of northern Japan, among which 242 are privately  
111 managed, mainly by fishers and cooperatives (Fig. 2a). The seven prefectural and 13 national  
112 hatcheries are primarily research facilities. The major target salmonid species are chum  
113 salmon (*Oncorhynchus keta*) and pink salmon (*O. gorbuscha*). The number of released chum  
114 salmon in Japan has increased remarkably since the 1970s, reaching a historical maximum of  
115 2.1 billion per annum in 1991. Since then, however, releases of chum salmon have  
116 dropped—to 1.5 billion in 2018 (North Pacific Anadromous Fish Commission, NPAFC, 2019)  
117 (Fig. A1). A similar increasing trend occurred with pink salmon starting in the 1970s; however,  
118 the number of released pink salmon is much smaller, namely, 113 million in 2018, which is  
119 approximately 7% of that of chum salmon. The number of masu salmon (*O. masou*) released  
120 in 2018 amounted to 7 million. Sockeye salmon (*O. nerka*) are also released, but at even  
121 smaller numbers (NPAFC, 2019).

122

123 The locations of marine hatcheries—so-called “saibai-gyogyo centres”—were also plotted by  
124 using a list of their addresses compiled by the National Association for Promotion of  
125 Productive Seas. Presently, 65 prefectural marine hatcheries operate in 43 prefectures (Fig.  
126 2b). In addition, 12 FRA research stations are operating; these were once national marine  
127 hatcheries managed by the Japan Sea-Farming Association, which merged with the FRA  
128 following administrative reform in 2003. Because the FRA stopped seed production for  
129 release, four previous national marine hatcheries have closed as of 2018. In 2017, 74 marine  
130 species (excluding salmon) were being released in Japan, including 34 fishes, 10 crustaceans,  
131 22 shellfishes, and 8 other marine species (e.g., sea urchin, sea cucumber, and octopus). I

132 organized the number of released seeds of the 16 major species whose annual release  
133 exceeded million seeds for the period 1983–2017 according to annual seed production and  
134 release statistics (Fishery Agency et al. 1985–2019). These species are abalone (*Haliotis* spp.),  
135 Japanese scallop (*Mizuhopecten yessoensis*), Manila clam (*Venerupis philippinarum*), green  
136 tiger prawn (*Penaeus semisulcatus*), kuruma prawn (*Marsupenaeus japonicus*), offshore  
137 greasyback prawn (*Metapenaeus ensis*), swimming crab (*Portunus trituberculatus*), black sea  
138 bream (*Acanthopagrus schlegelii*), flatfish (e.g., *Limanda yokohamae*), Japanese flounder  
139 (*Paralichthys olivaceus*), Pacific herring (*Clupea pallasii*), red sea bream (*Pagrus major*),  
140 sailfin sandfish (*Arctoscopus japonicus*), tiger puffer (*Takifugu rubripes*), sea urchins (e.g.,  
141 *Strongylocentrotus intermedius* and *Heliocidaris crassispina*), and sea cucumber  
142 (*Apostichopus armata*). The number of releases of 10 species has been decreasing, including  
143 iconic target species such as kuruma prawn, swimming crab, abalone, red sea bream, Japanese  
144 flounder, and sea urchin (Figs. A2, A3; Supplementary Data). The number of releases of  
145 Japanese scallop has slightly increased, while releases of tiger puffer, Pacific herring, and sea  
146 cucumber have significantly increased. The changes in release practices reflect changes in  
147 subsidies and budgets of the Fisheries Agency and prefectural governments, thus showing that  
148 the Japan marine stock enhancement programme has been governmentally led. The only  
149 exception is Japanese scallop stocking, which is run by the fishers themselves.

150

### 151 **Evaluation of stocking effects**

152 In earlier surveys, the counting of external tags reported by fishers was the main method used  
153 to estimate recapture rates (Kitada 1999). This type of survey was applied to estimate  
154 migration, growth, and life history, including comparisons of seed quality (Kitada & Hirano  
155 1987; Shiota & Kitada, 1992; Kitada et al. 1994; Okouchi et al. 1994; Takaba et al. 1995).  
156 Tag-reporting rates were often very small, however, and tag-shedding and tagging mortality

157 caused biased estimates. Researchers became aware of bias in the results when they estimated  
158 stocking effectiveness. As an alternative approach, surveys of commercial landings at fish  
159 markets (SCFM) have been used to estimate landings of released seeds and the hatchery  
160 contribution to the landings. By sampling landings at fish markets, researchers have aimed to  
161 comprehensively estimate the stocking effect. The SCFM approach was first applied to red  
162 sea bream in Kagoshima Bay. To identify released fish at this location, almost all red sea  
163 bream landed at the Kagoshima Fish Market were checked for a deformity of the internostrial  
164 epidermis (Shishidou 2002; Shishidou & Kitada 2007; Kitada et al. 2019). To sample  
165 Japanese flounder in Miyako Bay, all flounder at the Miyako fish market were examined  
166 (Okouchi et al. 1999, 2004). Because such a census approach was generally difficult to apply,  
167 sampling surveys have been accordingly introduced throughout the country. The procedure  
168 used in these surveys is to check all fish landed and sold at a selected market on a selected  
169 day to differentiate released seeds from wild individuals. This latter approach, treated as a  
170 procedure, implemented in two stages to allow for the formulation of estimators and their  
171 variance (Kitada et al. 1992), has been applied to abalone (Kojima 1995), kuruma prawn  
172 (Yamaguchi et al. 2006), and masu salmon (Miyakoshi et al. 2001). When information on  
173 total landing days is lacking, simple random sampling is assumed, and landings from releases  
174 are then estimated (Obata et al. 2008). Some other SCFM-based studies have assumed simple  
175 random sampling, but the precision was not evaluated in most cases. In yet another approach,  
176 genetic marking has been applied to mud crab (*Scylla paramamosain*) to estimate recapture  
177 rates using genetic stock identification (Obata et al. 2006).

178

179 A population dynamic model was developed to predict the effects of fishing regulations and  
180 hatchery releases on fishery production. Under the auspices of the Fisheries Agency, the Japan  
181 Sea-Farming Association tested this model using red sea bream and Japanese flounder data



182 collected throughout the country (Kitada & Okouchi 1994). The model parameters were then  
183 adjusted to fit predicted catches with observed ones. Although the retrospective prediction  
184 was particularly sensitive to natural mortality coefficient values and parameters in the  
185 reproduction models, such models of simulated fishery production are convenient for  
186 ascertaining the relative effect of fishery management and release strategies. Indeed, similar  
187 simulation models are presently being used for Pacific herring, Japanese flounder, and tiger  
188 puffer. In many cases, however, the predictions have failed—such as with Japanese Spanish  
189 mackerel (*Scomberomorus niphonius*) in the Seto Inland Sea (Obata et al. 2007) and red sea  
190 bream in Kagoshima Bay (Shishidou et al. 2012).

191

192 To boost the effectiveness of hatchery releases, a marine-ranching project led by the Fishery  
193 Agency endeavoured to shape ‘natural’ farms to provide sound habitat, such as enhanced  
194 seaweed communities to promote nutrient enrichment in deep-sea upwelling systems (AFFRC  
195 1989). The major technologies applied for marine fishes that can be reared and released as  
196 seeds around artificial reefs have been hatchery releases and artificial reef construction, and  
197 feeding systems with acoustic conditioning are also a popular tool (Kudo & Kimoto 1994;  
198 Kayano et al. 1998). I could not find scientific literature evaluating the effectiveness of  
199 Japan’s marine-ranching projects, and their usefulness thus remains largely unknown.  
200 Consequently, I excluded the effects of marine ranching in Japan from my subsequent  
201 analyses.

202

### 203 **Meta-analysis of stocking effects**

#### 204 **Indices of stocking effect and Bayesian summary statistics**

205 I used recapture rates, yield-per-release (YPR), and economic efficiency as indices of the  
206 performance of hatchery releases. YPR is defined as the weight of fish caught (g) per

207 individual released (Svåsand et al. 2000; Kitada & Kishino 2006; Hamasaki & Kitada 2008b)  
208 as follows:

$$YPR = r \times w$$

209 where  $r$  is the recapture rate of released juveniles, and  $w$  (g) is mean body weight per  
210 recaptured individual. Economic efficiency ( $E$ ) was calculated as the ratio of net income to  
211 release costs:

$$E = YPR \times v/c.$$

213 Here,  $v$  is fish price per gram, and  $c$  is the cost of each seed; therefore,  $v/c$  is the cost  
214 performance of a seed (Kitada 2018). The true mean for the recapture rate, YPR, and  
215 economic efficiency for each study ( $y_i$ ) was not observed but instead estimated ( $\hat{y}_i$ ,  $i =$   
216  $1, \dots, n$ ). When samples (i.e., cases within a study) were taken by random sampling, then  
217  $E(\hat{y}_i) = y_i$ , and the variance within each study ( $\sigma_i^2$ ) was also estimated from the data ( $s_i^2$ ).

218

219 The release variables, such as tags, sizes at release, release areas, and time periods of surveys,  
220 varied in each study; therefore, the summary statistics needed to account for this variation  
221 among studies. Here, I assumed a superpopulation for the recapture studies by applying a  
222 Bayesian approach. The sample mean of the  $i$ -th case study ( $\hat{y}_i$ ) may follow a normal  
223 distribution in accordance with the central limit theorem. Because studies were carried out in  
224 different areas and years, each study could be regarded as independent. For this condition, the  
225 approximate likelihood of the sample mean  $\hat{y}_i$  ( $i = 1, \dots, n$ ) can be written as:

$$L(\hat{y}_i (i = 1, \dots, n) | y_i (i = 1, \dots, n)) = \prod_{i=1}^n \frac{1}{\sqrt{2\pi\sigma_i^2}} \exp\left(-\frac{1}{2\sigma_i^2}(\hat{y}_i - y_i)^2\right)$$

226 I assumed a prior distribution for  $y_i$  ( $i = 1, \dots, n$ ), where  $y_i$  is assumed to be normally  
227 distributed around the mean  $\mu$  with variance  $\sigma^2$ . The mean and variance of the  
228 superpopulation are hyperparameters. The prior distribution of  $y_i$  ( $i = 1, \dots, n$ ) can be

229 written as:

$$\pi(y_1, \dots, y_n | \mu, \sigma^2) = \prod_{i=1}^n \frac{1}{\sqrt{2\pi\sigma^2}} \exp\left(-\frac{1}{2\sigma^2} (y_i - \mu)^2\right)$$

230 By integrating the product of the prior distribution and the likelihood function in terms of  $y_i$ ,  
231 the marginal likelihood function was derived. In this case, it was explicitly obtained as:

$$\tilde{L}(\sigma^2, \mu | \hat{y}_i(1, \dots, n)) = \prod_{i=1}^n \frac{1}{\sqrt{2\pi(\sigma^2 + \sigma_i^2)}} \exp\left(-\frac{1}{2(\sigma^2 + \sigma_i^2)} (\hat{y}_i - \mu)^2\right)$$

232 According to this equation, the sample mean  $\hat{y}_i$  is distributed around the mean  $\mu$ , with  
233 variances calculated for between cases and within cases.

234

235 The log marginal likelihood function is:

$$\log \tilde{L}(\sigma^2, \mu | \hat{y}_i(1, \dots, n)) = -\frac{n}{2} \log 2\pi - \frac{1}{2} \sum_{i=1}^n \log(\sigma^2 + \sigma_i^2) - \frac{1}{2} \sum_{i=1}^n \frac{1}{\sigma^2 + \sigma_i^2} (\hat{y}_i - \mu)^2$$

236 The first derivatives on  $\mu$  and  $\sigma^2$  are then:

$$\frac{\partial \log \tilde{L}}{\partial \mu} = \sum_{i=1}^n \frac{1}{\sigma^2 + \sigma_i^2} (\hat{y}_i - \mu)$$

$$\frac{\partial \log \tilde{L}}{\partial \sigma^2} = -\frac{1}{2} \sum_{i=1}^n \frac{1}{\sigma^2 + \sigma_i^2} + \frac{1}{2} \sum_{i=1}^n \frac{1}{(\sigma^2 + \sigma_i^2)^2} (\hat{y}_i - \mu)^2$$

237 From  $\partial \log \tilde{L} / \partial \mu = 0$ , the maximum likelihood estimator (MLE) of  $\mu$  as a weighted average  
238 of  $\hat{y}_i$  ( $i = 1, \dots, n$ ) is obtained as follows:

$$\hat{\mu} = \sum_{i=1}^n \frac{\hat{y}_i}{\sigma^2 + \sigma_i^2} / \sum_{i=1}^n \frac{1}{\sigma^2 + \sigma_i^2} \quad (1)$$

239 By substituting  $\sigma^2$  with  $\hat{\sigma}^2$  from Eq. (2) and  $\sigma_i^2$  with the sample variance  $s_i^2$ , the MLE of  
240  $\mu$  (posterior mean) is obtained.

241

242 Assuming for simplicity that  $\sigma_i^2$  does not depend on a particular case,  $\sigma_i^2 = \sigma'^2$  for all  
243  $i (1, \dots, n)$  and from  $\partial \log \tilde{L} / \partial \sigma^2 = 0$ , the MLE of  $\sigma^2$  is:

$$\hat{\sigma}^2 = \frac{1}{n} \sum_{i=1}^n (\hat{y}_i - \mu)^2 - \sigma'^2$$

244 By estimating  $\mu$  by the weighted average  $\hat{\mu}$  given by Eq. (1) and  $\sigma'^2$  by the mean of the  
245 sample variance  $s_i^2$ , the approximate variance estimator is:

$$\hat{\sigma}^2 = \frac{1}{n} \sum_{i=1}^n (\hat{y}_i - \hat{\mu})^2 - \frac{1}{n} \sum_{i=1}^n s_i^2 \quad (2)$$

246

247 The MLE of  $\mu$  used here had a different weight than the weighted mean (also the MLE) used  
248 in my previous study (Kitada 2018), while  $\hat{\sigma}^2$  was the same. Eq. (1) provided a more  
249 realistic estimate than that obtained using the previous weighted average, particularly when  
250 very small  $\hat{y}_i$  values ( $\hat{y}_i < 1$ ) were included (i.e., when there was large variation in  $\hat{y}_i$ ). The  
251 average and standard deviation (SD) with a 95% confidence interval (mean  $\pm$  2 SD) were  
252 visualized for each case using the 'forestplot' function in R. When the lower confidence limit  
253 took a negative value, it was replaced by 0.

254

## 255 **Recapture rate**

256 I summarized 21 full-scale programmes that reported recapture rates of hatchery individuals  
257 based on various marking methods (Table A1). Eighteen of these programmes were also  
258 included in my previous study (Kitada 2018). The mean recapture rate of chum salmon was  
259 newly calculated for Hokkaido, the main production area, and was based on simple return  
260 rates (number of fish returned after 4 years/number released) taken from the FRA website  
261 ([salmon.fra.affrc.go.jp](http://salmon.fra.affrc.go.jp)). Recapture rates from 17 of 21 studies of marine species were  
262 estimated using SCFM data or a combination of SCFM data and reported recaptures. In

263 addition, recapture rates were summarized from previous reviews for the whole country for  
264 red sea bream (Kitada & Kishino 2006), kuruma prawn (Hamasaki & Kitada 2006, 2008b),  
265 and abalone (Hamasaki & Kitada 2008a). Recapture rates were calculated for black rockfish  
266 (*Sebastes schlegelii*) (Nakagawa et al. 2004), Japanese flounder (Kitada et al. 1992; Tominaga  
267 & Watanabe 1998; Ishino 1999; Atsuchi & Masuda 2004; Tomiyama et al. 2008), Japanese  
268 scallop (Kitada & Fujishima 1997), Japanese Spanish mackerel (Obata et al. 2008), mud crab  
269 (Obata et al. 2006), short-spined sea urchin (*Strongylocentrotus intermedius*) (Sakai et al.  
270 2004), spotted halibut (*Verasper variegatus*) (Wada et al. 2012), swimming crab (Okamoto  
271 2004), and tiger puffer (Nakajima et al. 2008). Moreover, I newly added four cases of three  
272 species: barfin flounder (*Verasper moseri*) in Hokkaido (Koya 2005; Murakami 2012;  
273 NPJSEC 2015), red spotted grouper (*Epinephelus akaara*) in Osaka Bay (Tsujiyama 2007),  
274 and tiger puffer in the Ariake Sea (Matsumura 2005, 2006); these cases were included because  
275 stocking effects have recently been reported for the first two species and the number of tiger  
276 puffer individuals released has increased in recent years (Fig. A3). In particular, more than  
277 one million juveniles (~8 cm total length, TL) of barfin flounder in Hokkaido have been  
278 released annually along the Pacific coast since 2006.

279

280 In total, recapture rates were included for 15 species comprising eight marine fishes, one  
281 salmonid, three crustaceans, two shellfishes, and one sea urchin (22 programmes) (Table A1).  
282 After excluding from analysis any cases that reported only point estimates, the recapture rates  
283 of marine species from 20 programmes (Table A1) varied widely among species and cases,  
284 ranging from 0.9% to 34.5% (Fig. 3). Japanese scallop had the highest recapture rate ( $34.5 \pm$   
285  $10.2\%$ ), followed by sea urchin ( $18.2 \pm 17.5\%$ ), both with relatively large variations. Most of  
286 the marine fishes, namely, barfin flounder, black rockfish, Japanese flounder, Japanese  
287 Spanish mackerel, red spotted grouper, spotted halibut, and tiger puffer (to age 0+), had

288 recapture rates in the range of 11%–15%. Abalone likewise had a relatively high and highly  
289 variable recapture rate ( $12.2 \pm 8.1\%$ ). Red sea bream had recapture rates of 7%–8% with only  
290 small variation. In contrast, the return rate of chum salmon was much smaller,  $3.6 \pm 1.1\%$  on  
291 Hokkaido and  $1.6 \pm 0.6\%$  on Honshu (figure not shown). Crustaceans generally had values  
292 smaller than 5%, with large variations in recapture rates observed for kuruma prawn ( $2.8 \pm$   
293  $4.5\%$ ) and mud crab ( $0.9 \pm 0.7\%$ ). The posterior mean recapture rate was  $8.3 \pm 4.7\%$ . The  
294 empirical distribution of the posterior mean showed that the recapture rates of any species  
295 could fall into that range with 95% probability.

296

### 297 **YPR and economic efficiency**

298 To analyse YPR and economic efficiency, I revisited 10 cases for which YPR and economic  
299 efficiency values were previously reported (Kitada 2018) and added six new cases: those of  
300 barfin flounder in Hokkaido, Japanese flounder at Fukushima, red spotted grouper in Osaka  
301 Bay, tiger puffer in the Ariake Sea, and swimming crab in Lake Hamana and in the Seto  
302 Inland Sea (Table A2). YPR and economic efficiency values were recalculated for kuruma  
303 prawn (Hamasaki & Kitada 2006, 2008b), swimming crab (Hamasaki et al. 2011), and  
304 abalone (Hamasaki & Kitada 2008a) based on previous reviews. For the calculation of the  
305 YPR of chum salmon, mean body weights were revised from 1974–2017 catch statistics  
306 obtained from the NPAFC and 1974–2017 return rates in Hokkaido obtained from the FRA  
307 (<http://salmon.fra.affrc.go.jp/zousyoku/sakemasu.html>). The revised mean body weight of  
308 chum salmon was  $3\,197 \pm 306$  g. Mean body weights were also recalculated for Japanese  
309 scallop based on Kurata (1999), yielding a revised estimate of  $177 \pm 30$  g. YPR values  
310 reported for pink salmon in Hokkaido by Ohnuki et al. (2015) were given in monetary terms  
311 (1.5–2.2 yen/released individual), which was calculated from the estimated proportion of  
312 Hokkaido-originated hatchery fish in the landings. Because the YPR of pink salmon in

313 Hokkaido was not provided in terms of weight, recapture rate, or cost performance of a seed  
314 ( $v/c$ ), I excluded this case from the analysis.

315

316 YPR and economic efficiency were ultimately evaluated for 16 cases involving 12 species  
317 (Table A2). After omitting cases with only point estimates for YPR and/or those without  
318 information needed for calculation of  $v$  and  $c$ , a meta-analysis was performed on 12 cases  
319 involving 9 species for YPR and 13 cases involving 10 species for economic efficiency. YPR  
320 values varied between species and cases. The empirical distribution of the summary statistics  
321 had a long tail to the right, with a posterior mean of  $65 \pm 74$  g (Fig. 4a). YPR was highest in  
322 barfin flounder ( $182 \pm 9$  g) and Japanese Spanish mackerel ( $170 \pm 8$  g), followed by chum  
323 salmon ( $119 \pm 45$  g) and Japanese scallop ( $61 \pm 18$  g), both in Hokkaido. Red sea bream and  
324 Japanese flounder had YPR values of 30–59 g. Other YPR values were  $34 \pm 10$  g for  
325 swimming crab,  $26 \pm 19$  g for abalone,  $4 \pm 3$  g for mud crab, and  $0.9 \pm 1.5$  g for kuruma  
326 prawn.

327

328 The posterior mean of economic efficiency was  $2.8 \pm 6.1$ . The economic efficiency of several  
329 cases ranged from approximately 1 (the break-even point) to 2, with the lower 95%  
330 confidence limit below 0 (Fig. 4b). The highest economic efficiencies were those of chum  
331 salmon ( $19 \pm 7$ ) and Japanese scallop ( $18 \pm 5$ ) in Hokkaido, where the seed cost for chum  
332 salmon was set at 2.5 yen/juvenile (Hokkaido Salmon Propagation Association 2017) (Table  
333 A2). The economic efficiency of red sea bream in Kagoshima Bay was also high ( $5 \pm 3$ ), with  
334 similar economic performances noted for abalone across coastal Japan ( $4 \pm 2$ ) and barfin  
335 flounder on the Pacific coast of Hokkaido ( $3 \pm 0.1$ ). Japanese flounder had a much smaller  
336 economic efficiency, 0.9–1.6. Crustaceans consistently exhibited economic efficiency values  
337 around 1; among them, kuruma prawn had the lowest value,  $0.7 \pm 0.9$ . Economic efficiency is

338 a function of YPR (recapture rate  $\times$  body weight) and the cost performance of a seed ( $v/c$ ). As  
339 shown in Fig. 4c, which is a scatter plot of YPR vs. economic efficiency that depicts the  
340 stocking-performance characteristic of each species, chum salmon and Japanese scallop in  
341 Hokkaido had the highest economic efficiencies.

342

343 I did not analyse net present value (NPV) (Sproul & Tominaga 1992; Moksness & Støle 1997;  
344 Moksness et al. 1998; Svåsand et al. 2000) because various data, such as annual costs for  
345 harvest, management, and interest rates, were not available for every case. If the economic  
346 efficiency estimates obtained here had relied on NPV, they would have been smaller (Kitada  
347 2018); in that case, the values of the estimates would have depended on interest rates and time  
348 duration (although interest rates in Japan are currently low,  $<0.1\%$ ). In addition, the seed cost  
349 used in the analysis did not include personnel expenses, facilities, monitoring, or  
350 administration costs; furthermore, it did not account for the cost of negative effects on natural  
351 populations and ecosystems (Waples 1991; Winton & Hilborn 1994; Hilborn 1998; Waples  
352 1999; Waples & Drake 2004; Amoroso et al. 2017). The estimates of economic efficiency  
353 obtained here are thus optimistic.

354

### 355 **Macro-scale contribution of released seeds to commercial landings**

356 I estimated the contribution of hatchery releases to the commercial catch of eight species for  
357 all of Japan based on national catch statistics (MAFF 1964–2018). These iconic species of  
358 Japan's marine stock enhancement and sea ranching programmes are intensively released  
359 within the range of Japanese waters. After releases of these eight species, catches of Japanese  
360 scallop and Japanese Spanish mackerel increased (Fig. 5), while those of Japanese flounder  
361 and red sea bream were stable. In contrast, catches of kuruma prawn and swimming crab have  
362 decreased continuously since the mid-1980s. Continuous declines in abalone and sea urchin



363 catches have also been observed since the early 1970s. Different reasons have been advanced  
364 to explain these various trends. Cases showing increasing catch levels are consistent with the  
365 frequent claims of management agencies and hatchery advocates that the practice of hatchery  
366 release should be successful. A popular explanation for cases displaying a stable catch is that  
367 hatchery release stabilizes recruitment. Instances of decreasing catches have been attributed to  
368 decreased numbers of releases; if more seeds were released, catch levels would increase. To  
369 test these ideas, estimates of the contribution of hatchery-released seeds to the catches would  
370 be helpful.

371

372 To evaluate hatchery contributions to major species for all of Japan, I computed the expected  
373 catch from released seeds by multiplying the average YPR (listed in Table A2) by the number  
374 of fish released every year (Supplementary Data). The contribution to Japanese Spanish  
375 mackerel was calculated solely from Seto Inland Sea data because hatchery releases of this  
376 species in Japan are made only at that location. This simple analysis assumed that YPR was  
377 constant over years and that released seeds created the catch in the same year. The analysis  
378 thus did not account for a time lag; however, it allowed macro-scale comparisons between  
379 species of the approximate contribution of hatchery releases (Kitada & Kishino 2006).

380

381 The largest proportion of released seeds,  $76 \pm 20\%$ , was for Japanese scallop, with released  
382 spat having a stable contribution (Fig. 5, vertical bars; Fig. A4). Wild scallop created by  
383 natural reproduction also contributed to the total catch. The catch decreased substantially  
384 during 2015–2017 following a bottom disturbance off the Okhotsk coast caused by a  
385 low-pressure bomb in December 2014 (Kitada 2018); according to the estimates for that time  
386 period, almost all of the catch comprised released spat, thus indicating that scallop  
387 populations in the fishing grounds were heavily damaged by the bottom disturbance.

388 Although the analysis was simple, the results demonstrate that this approach was able to  
389 describe the population dynamics of Japanese scallop in Hokkaido.

390

391 The hatchery contribution to the increased catch of Japanese Spanish mackerel was very small,  
392  $2 \pm 2\%$ . The catch of this fish continued to recover after releases; however, the number of  
393 released juveniles was reduced 10 years after the beginning of the release project. These  
394 results clearly indicate that the population dynamics of this species were unaffected by the  
395 releases. A previous study found 35% variation in the biomass of age-0 Japanese Spanish  
396 mackerel, an observation that could be explained by the biomass of a prey fish, Japanese  
397 anchovy (Nakajima et al. 2013). In another investigation, genetic stock identification  
398 following releases in 2001 and 2002 found admixture proportions of hatchery-origin fish at  
399 8%–15% (Nakajima et al. 2014). Interestingly, the genetic admixture contribution of hatchery  
400 fish in the Seto Inland Sea was much higher than estimated contribution rates ( $2 \pm 2\%$ ) in the  
401 present study, similar to findings for red sea bream in Kagoshima Bay (Kitada et al. 2019),  
402 again implying a trans-generational genetic effect. The hatchery contribution of Japanese  
403 flounder was  $11 \pm 4\%$ , and that of red sea bream was  $7 \pm 2\%$ . Over two decades, the number  
404 of released juveniles decreased by ~50% for flounder and ~63% for red sea bream, but  
405 catches of wild fish remained stable; this indicates that the hatchery releases did not boost the  
406 population size of either species on a macro-scale. On the basis of carrying capacity, natural  
407 reproduction should have supported the recruitment.

408

409 Among crustaceans, the hatchery contribution of kuruma prawn was  $13 \pm 5\%$ . These results  
410 are in agreement with estimates for kuruma prawn from previous research (Hamasaki &  
411 Kitada 2013), namely, ~10% throughout Japan from 1977 to 2008. In that study, the decline in  
412 kuruma prawn catches was potentially attributed to warming ocean conditions, decreased

413 fishing efforts due to fewer fishers, and reduced hatchery releases. A continuously decreasing  
414 trend in the catch implies a decline in natural recruitments, which suggests an environmental  
415 effect is responsible (Fig. 5). Reduced fishing efforts would likely work to increase population  
416 size, as demonstrated in the case of red sea bream (Kitada et al. 2019). A reduction in fishing  
417 efforts can therefore be excluded as a cause of the decreasing catches of kuruma prawn. For  
418 swimming crab, the hatchery contribution was  $20 \pm 5\%$ ; the catch continuously decreased,  
419 again showing a decline in natural recruitment. Juvenile crabs are also found on tidal flats  
420 after the C4 stage (~16 mm carapace width, CW) and/or C5 stage (~22 mm CW) (Hamasaki  
421 et al. 2011). The catches of swimming crab were positively correlated with those of kuruma  
422 prawn ( $r = 0.52$ ,  $t = 4.49$ ,  $df = 53$ ,  $p = 3.9 \times 10^{-5}$ ), suggesting a common environmental  
423 effect on juveniles of both species.

424

425 Abalone displayed a relatively high and stable hatchery contribution rate ( $28 \pm 10\%$ ), yet the  
426 catch of this species continued to decrease, indicating decreases in natural recruitment. A  
427 negative correlation has been found between the Aleutian Low-Pressure Index, winter sea  
428 surface temperatures, and catches of Ezo abalone (*Haliotis discus hannai*) in northern Japan  
429 (Nakamura et al. 2005; Hayakawa et al. 2007), and cold winter seawater temperatures ( $<5^\circ\text{C}$ )  
430 affect the survival of young Ezo abalone (Takami et al. 2008). Seaweed community richness  
431 (carrying capacity) is the key factor for successful abalone stocking in Japan (Hamasaki 2008).  
432 I could not calculate the hatchery contribution rates of sea urchin because no published  
433 information for calculating YPR values was found. Surprisingly similar to abalone, however,  
434 the catch of sea urchin exhibited a decreasing trend ( $r = 0.96$ ,  $t = 24.63$ ,  $df = 53$ ,  $p = 2.2 \times$   
435  $10^{-16}$ ), thereby indicating that sea urchin abundance likewise heavily depends on the richness  
436 of the seaweed community.

437

438 **Economic, ecological and genetic impacts of the world's largest programmes**

439 Broodstock management for hatchery stocking typically involves three different approaches:  
440 (I) wild collection of larvae, (II) wild collection of parents (may include individuals of  
441 hatchery-origin), and (III) captive breeding (Kitada 2018). Among the 22 cases examined  
442 above, 15 were type III, 6 were type II, and 1 was type I (Table A1). To summarize the  
443 impacts of the world's largest stocking programmes, I analysed three programmes with  
444 contrasting management approaches and with the highest economic efficiency values: red sea  
445 bream in Kagoshima Bay and Japanese scallop and chum salmon, both in Hokkaido. The  
446 broodstock management approaches used in these programmes are as follows: for Japanese  
447 scallop, collection of wild larvae from the sea (type I); for chum salmon, collection of parents  
448 from the wild (type II); and for red sea bream, captive breeding in a concrete tank (type III).  
449 Because all three broodstock management approaches are thus represented, the three case  
450 studies analysed here may be useful for predicting the long-term impacts of hatchery stocking  
451 programmes worldwide.

452

453 **Red sea bream in Kagoshima Bay (type III)**

454 The hatchery-release programme for red sea bream in Kagoshima Bay is one of the world's  
455 largest programmes for marine fish species and the best-monitored one in Japan. Since the  
456 programme's beginning in 1974, ~27 million hatchery-reared red sea bream (6–7 cm TL) have  
457 been released in the bay. Starting in 1974, the broodstock of red sea bream intended for  
458 release in Kagoshima Bay have been reared in a 100-m<sup>3</sup> concrete tank. In particular,  
459 approximately 130 non-local red sea bream broodstock are maintained in the concrete tank for  
460 natural spawning and have been repeatedly used as broodstock. In 1999 and 2014, 395 wild,  
461 33 farmed, and numerous 2-year-old hatchery fish produced from the broodstock were added  
462 to the broodstock. The number of parent fish used for seed production has varied from

463 approximately 45 to 187 annually. During 1989–2015, 1.6 million red sea bream were  
464 examined at fish markets to identify hatchery fish caught in the bay. The catch of hatchery  
465 fish reached 126 tonnes by 1991 but thereafter consistently decreased, dropping to 3 tonnes  
466 by 2016. This decrease was due to a decline in fitness of the hatchery-reared fish in the wild,  
467 which was caused by the repeated use of parent fish reared in captivity (captive breeding)  
468 since 1974 (~nine generations). In contrast, the catch of wild fish increased after 1991 and  
469 reached a maximum in 2016 following releases amounting to 168 tonnes. Denser seaweed  
470 communities and reduced fishing efforts were the primary factors leading to the recovery of  
471 the wild population of red sea bream. These results clearly show that the recovery of nursery  
472 habitats and reductions in fishing efforts were more effective than hatchery stocking for  
473 recovering depleted populations (see Kitada et al. 2019 for detailed information).

474

475 As seen in this example, the hatchery releases of red sea bream into Kagoshima Bay  
476 substantially increased fisheries production for the first 15 years, a period during which the  
477 programme came to be regarded as representative and successful in Japan; importantly,  
478 however, the catch of hatchery fish then steadily decreased and remained very low. The  
479 declining catch of red sea bream in Kagoshima Bay was attributed to genetic effects (Kitada  
480 et al. 2019) through unintended domestication/selection by captive breeding (Ford 2002;  
481 Araki et al. 2007, 2008). Ample evidence exists that captive breeding of salmonids can reduce  
482 the fitness of hatchery salmon in the wild (Reisenbichler & McIntyre 1977; Fleming et al.  
483 2000; McGinnity et al. 2003; Araki et al. 2007; Christie et al. 2014). Cumulative recapture  
484 rates of red sea bream until age 8+ decreased  $15.6 \pm 1.7\%$  (standard error, SE) per year. In  
485 addition, the rate of fitness reduction in hatchery-reared populations was cohort-specific; it  
486 was constant over time within the cohort but exponentially decreased with the duration of  
487 captivity (Kitada et al. 2019). Indeed, the proportion of hatchery fish in landings in inner and

488 central parts of Kagoshima Bay and outside of the bay were highest in 1990, at 83.3%, 33.5%,  
489 and 7.4%, respectively, but the proportion in 2015 was only ~1.0% (even in the inner part)  
490 (Kitada et al. 2019). This observation suggests that once a fitness decline arises in a hatchery  
491 population, the reduction in fitness may continue until the broodstock are completely replaced  
492 by wild fish.

493

494 Gene flow between red sea bream populations was very high, thereby expanding the area  
495 affected by the hatcheries. Although more areas would thus be affected, the influence on the  
496 meta-population was not very strong. A genetic diversity analysis of fish collected from  
497 Kagoshima Bay suggested that the genetic effects of hatchery releases were gradually diluted  
498 by backcrossing with wild populations (Kitada et al. 2019), which would diminish the genetic  
499 effects of captive breeding if such effects were additive (Roberge et al. 2008). The increasing  
500 population of wild fish in Kagoshima Bay showed no fitness decline attributable to the small  
501 proportion of hatchery fish in the meta-population. The genetic effects of captive breeding can  
502 be gradually diluted if the proportion of hatchery fish in the recipient population is not  
503 substantial.

504

505 Care should be taken, however, when speculating about cases with very high proportions of  
506 hatchery fish in the recipient population, particularly cases that use captive breeding.

507 Captive-reared parents have been repeatedly used for abalone, barfin flounder, black sea  
508 bream, Japanese flounder, and tiger puffer (Table A1). In the case of barfin flounder, one  
509 million juveniles (~8 cm TL) were released annually on the Pacific coast of Hokkaido. The  
510 catch increased markedly, from 0.01 tonnes in 1996 to over 100 tonnes in 2015, and almost all  
511 catches in the North Pacific, from Ibaraki Prefecture to Hokkaido (170 tonnes), consisted of  
512 hatchery fish (NPJSEC 2015). In the case of barfin flounder, ~500 parent fish have been used

513 for seed production for 1–3 generations in captivity, and the expected heterozygosity is very  
514 high, 0.87 (Andoh et al. 2013). More generations of barfin flounder are needed before the  
515 impacts of this case can be determined.

516

### 517 **Japanese scallop (type I)**

518 Japanese scallop accounts for ~27% of landings at the Hokkaido fishery  
519 ([www.pref.hokkaido.lg.jp](http://www.pref.hokkaido.lg.jp)), where all scallop landings are obtained from releases of wild-born  
520 spat or from naturally-reproduced spat of released individuals (Kitada et al. 2001; Nishihama  
521 2001; Uki 2006). Initiated by fishers, who pay most of the programme costs (Uki 2006), the  
522 scallop-ranching programmes in Hokkaido are managed by cooperatives. The management  
523 system for Japanese scallop used by the cooperatives has four components: (1) mass-releases  
524 of wild-born spat (wild-born sea-collected larvae are reared in net cages for 1 year prior to  
525 release); (2) removal of predators, such as starfish, before release; (3) monitoring of the  
526 density of scallops in the fishing ground; and (4) rotation of fishing grounds chosen for  
527 harvesting (Goshima & Fujiwara 1994; Kitada et al. 2001; Uki 2006). The fishing grounds are  
528 generally partitioned into four areas, and 1-year-old wild-born spat (~4.5 cm) reared in net  
529 cages are released into a given area after removal of starfish. After 3 years, the 4-year-old  
530 released scallops are harvested. The following year, spats are released into another area. This  
531 fishing-ground rotation system enables complete prohibition of the fishery for 3 years after  
532 release.

533

534 Catches of Japanese scallop in the release areas, which have increased remarkably since the  
535 first releases in the 1970s, reached a historical maximum of 359 000 tonnes in 2014 (Fig. 6a,  
536 updated from Kitada 2018). In 2015, the catch dropped substantially, to 232 000 tonnes (65%),  
537 because of a bottom disturbance on the Okhotsk coast caused by a low-pressure bomb on

538 16–17 December 2014 (Kitada 2018), but recovered to 305 000 tonnes in 2018, as expected.

539 The catch recovery in 2018 would have been created by spat released in 2015. The long-term

540 trends in these release and catch statistics demonstrate that sea ranching of scallop in

541 Hokkaido has been successful, with the highest observed economic efficiency ( $18 \pm 5$ ).

542

### 543 **Chum salmon (type II)**

544 Chum salmon hatchery-stock enhancement in Japan is one of the world's largest salmon

545 stocking programmes (Amoroso et al. 2017). Hokkaido produces ~80% of chum salmon

546 returning to Japan, and fishery production accounts for 21% of the catch at the Hokkaido

547 fishery ([www.pref.hokkaido.lg.jp](http://www.pref.hokkaido.lg.jp)). Because most landings are created by releases of

548 hatchery-born fish (Kaeriyama 1999), fishers pay ~7% of their landings of chum salmon to

549 the hatcheries in Hokkaido (Kitada, 2014). Long-term trends in releases and catches indicate

550 that the maximum carrying capacity of natural rivers is ~10 million fish and that a large

551 increase in the fish population was created by hatchery stocks (Fig. 6b, updated from

552 Miyakoshi et al. 2013). Total production in Hokkaido reached a historical maximum of 61

553 million returns in 2004 and then substantially decreased to 16 million in 2017. Chum salmon

554 in Japan are at the southern margin of the species range. My previous study found that 30% of

555 the variation in decreasing catches could be attributed to an increasing sea surface temperature

556 (SST) anomaly, and 62% was explained by SST and catches by Russians after 1996 (Kitada

557 2018). Clear differences have been found, however, between the run timing of chum salmon

558 populations in Russia (Jun–Aug) and Japan (Sep–Nov), and migration routes are also different

559 (Kondo et al. 1965; Morita 2016). These results suggest that the negative correlation between

560 Japanese and Russian catches reported in the previous study was spurious.

561

562 No evidence of fitness decline has been reported among hatchery-born and wild-born chum



563 salmon in Japan. The observed genetic effect is instead an altered population structure, with  
564 some populations nested across seven and/or eight regional groups (Beacham et al. 2008;  
565 Kitada 2014; Sato et al. 2014; Kitada 2018). The run-timing distribution of Hokkaido chum  
566 salmon has been altered by the preferential enhancement of early-running fish (returning in  
567 September/October), and the late-running population has almost disappeared (Miyakoshi et al.  
568 2013). A lower reproductive success has been observed for early-spawning sockeye salmon in  
569 Washington State, USA, and early-emerging juveniles have had relatively low survival in  
570 recent years. These observations suggest that the skewed distribution of early spawning in  
571 Japan could reduce population fitness during a warming climate (Tillotson et al. 2019).

572

573 Almost all chum salmon returning to Japan are hatchery-reared fish (Kaeriyama 1999). These  
574 hatchery-reared fish are produced every year from returning adults, and the number of  
575 maintained parent fish has been very large (i.e., 15 000–85 000) (Kitada 2018). Even so,  
576 naturally spawning chum salmon have been detected in 31%–37% of 238 non-enhanced rivers  
577 surveyed in Hokkaido (Miyakoshi et al. 2012) and in 94% of 47 enhanced rivers and 75% of  
578 47 non-enhanced rivers on the northern coast of Honshu Island (Sea of Japan) (Iida et al.  
579 2018). In addition, a study using otolith thermal-marking estimated the proportion of naturally  
580 spawned chum salmon to total production at 16%–28% in eight rivers in Hokkaido, with large  
581 variation (0%–50%) (Morita et al. 2013). Despite variations in the proportion of natural  
582 spawning in rivers, gene flow facilitates the genetic admixture of hatchery-released fish,  
583 hatchery descendants, and wild fish in the entire Japan population. To visualize the magnitude  
584 of gene flow between populations, I re-examined microsatellite data from 26 chum salmon  
585 populations in Japan (14 loci,  $n = 6,028$ ; Beacham et al. 2008) and computed  $F_{ST}$  values  
586 between population pairs based on the bias-corrected  $G_{ST}$  (Nei & Chesser 1983) using the  
587  $G_{ST}^{NC}$  function in the R package FinePop1.5.1. This  $G_{ST}$  estimator provides an unbiased

588 estimate of  $F_{ST}$  when the number of loci becomes large (Kitada et al. 2017). I then  
589 superimposed a diagram in which population pairs with pairwise  $F_{ST}$  values  $< 0.01$  were  
590 connected by lines onto a map of hatchery locations (Fig. 7). The mean pairwise  $F_{ST}$  was very  
591 small ( $0.007 \pm 0.003$ ). The  $F_{ST}$  threshold of 0.01 was based on the relationship  $4N_e m = 99$ ,  
592 where  $N_e$  is effective population size and  $m$  is migration rate, corresponding to 99 effective  
593 parents migrating between each pair of populations per generation (see Waples & Gaggiotti  
594 2006). Figure 7 depicts substantial gene flow between rivers. The causal mechanisms of  
595 population structuring are migration and genetic drift, and differentiation depends on the  
596 number of migrants ( $N_e m$ ) (Waples & Gaggiotti 2006; Hauser & Calvalho 2008). Even in  
597 Atlantic cod (*Gadus morhua*), a species with high gene flow, temporally stable but  
598 significantly differentiated structure can be detected among populations (Hauser & Calvalho  
599 2008). Constant gene flow among populations can create a stable genetic mixture in a  
600 meta-population, such as that observed in Pacific herring populations in northern Japan  
601 (Kitada et al. 2017). These results suggest that the nested population structure observed across  
602 the seven and/or eight regional groups was caused by past translocations (Beacham et al.  
603 2008; Kaeriyama & Qin 2014).

604

605 Hatchery practices might increase the likelihood of chum salmon to stray (Quinn, 1993). I  
606 summarized the results of marking studies of chum salmon juveniles in Hokkaido, where 2  
607 028 thousand hatchery-reared salmon juveniles (3.5–4 cm BL, 0.45–5 g) were fin-clipped  
608 and/or operculum-clipped and released without rearing between 1951 and 1955 (Sakano  
609 1960). According to the results,  $50 \pm 22\%$  of 2 085 recoveries were recaptured in the river of  
610 their release, and  $84 \pm 12\%$  were found when recoveries along nearby coasts were included  
611 (Supporting Data); hence, the spawning fidelity of hatchery-reared chum salmon was  
612 moderate. Estimates of straying can vary largely between specific hatchery releases and rivers,

613 but the genetic integrity of a population can be altered by straying regardless of the strength of  
614 the native population's spawning fidelity (Quinn 1993). Early theoretical work predicted that  
615 >99% (50%) of wild genes with additive effects are replaced by hatchery genes in 12  
616 generations (2 generations for 50% of wild genes) in the case of equal fitness between  
617 hatchery and wild fish at a stocking rate of 0.5 (Matsuishi et al. 1995; see also Fig. 5 in Kitada  
618 et al. 2019). Taking all of these results in consideration, I speculate that all chum salmon  
619 returning to Japan are hatchery-released fish or wild-born hatchery descendants. This situation  
620 is similar to that of hatchery-reared red sea bream in Kagoshima Bay. The significant decline  
621 in the number of returns of Japanese chum salmon may therefore be caused by a fitness  
622 decline in populations induced by long-term hatchery stocking. Indeed, long-term hatchery  
623 releases have reduced the athletic abilities of Japanese chum salmon; they have also altered  
624 the frequencies of thermal adaptation genes LDH-A1 and LDH-B2—in opposition to natural  
625 selection that would eventually cause hatchery fish to adapt to colder environments—thereby  
626 resulting in a continuous decline in the fitness of whole populations (Kitada & Kishino 2019).  
627

## 628 **Conclusions**

629 All cases of Japanese hatchery releases, except Japanese scallop, are economically  
630 unprofitable if the costs of personnel expenses, facility construction, monitoring, and negative  
631 impacts on wild populations are taken into account. Stocking effects are generally small,  
632 while the population dynamics are unaffected by releases but instead essentially depend on  
633 the carrying capacity of the nursery habitat. Hatchery rearing can reduce the fitness of  
634 hatchery fish in the wild, and long-term hatchery stocking can replace wild genes and cause  
635 fitness decline in the recipient population when the proportion of hatchery fish is very high.  
636 Short-term uses of hatchery stocking can be helpful, particularly for conservation purposes,  
637 but long-term programmes harm the sustainability of populations. Recovery of nursery

638 habitats and reduction in fishing efforts outperform hatcheries in the long run.

639

## 640 **Acknowledgements**

641 I thank Hirohisa Kishino, Katsuyuki Hamasaki, Yasuyuki Miyakoshi, Mitsuhiro Nagata, and  
642 Shigeki Dan for useful comments on an earlier version of this manuscript. I expression my  
643 appreciation to Toshio Okazaki for valuable suggestions, Tomonari Fujita for providing  
644 addresses of marine hatcheries, and Reiichiro Nakamichi for help with map construction. This  
645 study was supported by the Japan Society for the Promotion of Science Grant-in-Aid for  
646 Scientific Research (KAKENHI) No. 18K0578116.

647

## 648 **Data Availability Statement**

649 All source data used are in the public sector, and links to their online sources are specified in  
650 the text or in Supplementary Data (will be submitted to bioRxiv).

651

## 652 **References**

653 Agriculture, Forestry and Fisheries Research Council (AFFRC) (1989) *Marine Ranching*.

654 Koseisha Koseikaku, Tokyo [in Japanese].

655 Amoroso RO, Tillotson MD, Hilborn R (2017) Measuring the net biological impact of

656 fisheries enhancement: Pink salmon hatcheries can increase yield, but with apparent

657 costs to wild populations. *Canadian Journal of Fisheries and Aquatic Sciences* **74**:

658 1233–1242.

659 Andoh T, Mikasa T, Ichikawa T (2013) Genetic monitoring and conservation programs to

660 maintain the genetic diversity. In: Aritaki M. (ed), *Stock Enhancement and Risk*

661 *Management for Coastal Fishery Resources-Monitoring on genetic diversity and*

662 *efficiency of stock enhancement*, pp. 38–53. Koseisha Koseikaku, Tokyo [in Japanese].

- 663 Araki H, Cooper B, Blouin MS (2007) Genetic effects of captive breeding cause a rapid,  
664 cumulative fitness decline in the wild. *Science* **318**: 100–103.
- 665 Araki H, Berejikian BA, Ford MJ, Blouin MS (2008) Fitness of hatchery-reared salmonids in  
666 the wild. *Evolutionary Applications* **1**: 342–355.
- 667 Araki H, Schmid C (2010) Is hatchery stocking a help or harm? Evidence, limitations and  
668 future directions in ecological and genetic surveys. *Aquaculture* **308** (S1): S2–S11.
- 669 Atsuchi S, Masuda Y (2004) Effectiveness of the releases of hatchery-produced stock of  
670 Japanese flounder *Paralichthys olivaceus* in Kagoshima Bay, southern Japan. *Nippon*  
671 *Suisan Gakkaishi* **70**: 910–921 [In Japanese with English abstract].
- 672 Beacham TD, Sato S, Urawa S, Lei KD, Wetklo M (2008) Population structure and stock  
673 identification of chum salmon *Oncorhynchus keta* from Japan determined by  
674 microsatellite DNA variation. *Fishery Science* **74**: 983–994.
- 675 Bell JD, Rothlisberg PC, Munro JL, Loneragan NR, Nash W J, Ward RD et al. (2005)  
676 *Restocking and stock enhancement of marine invertebrate fisheries. Advances in*  
677 *Marine Biology* **49**, Elsevier, Oxford.
- 678 Blaxter JHS (2000) The enhancement of marine fish stocks. *Advances in Marine Biology* **38**:  
679 1–54.
- 680 Christie MR, Marine ML, French RA, Blouin MS (2012) Genetic adaptation to captivity can  
681 occur in a single generation. *Proceedings of the National Academy of Sciences* **109**:  
682 238–242.
- 683 Christie MR, Ford MJ, Blouin MS (2014) On the reproductive success of early - generation  
684 hatchery fish in the wild. *Evolutionary Applications* **7**: 883–896.
- 685 Fisheries Agency, Fisheries Research Agency (FRA), National Association for the Promotion  
686 of Productive Sea (eds.) (1985–2019) *Annual Statistics of Seed Production and Release*  
687 *in 1983–2017*. FRA, Yokohama [in Japanese].

- 688 Fleming IA, Hindar K, MjÖlnerÖd IB, Jonsson B, Balstad T, Lamberg A (2000) Lifetime  
689 success and interactions of farm salmon invading a native population. *Proceedings of*  
690 *the Royal Society of London B* **267**: 1517–1523.
- 691 Ford MJ (2002) Selection in captivity during supportive breeding may reduce fitness in the  
692 wild. *Conservation Biology* **16**, 815–825.
- 693 Fushimi H (2001) Production of juvenile marine finfish for stock enhancement in Japan.  
694 *Aquaculture* **200** (1–2): 33–53.
- 695 Goshima S, Fujiwara H (1994) Distribution and abundance of cultured scallop *Patinopekten*  
696 *yessoensis* in extensive sea beds as assessed by underwater camera. *Marine Ecology*  
697 *Progress Series* **110**: 151–158.
- 698 Hamasaki K (2008) Environmental change and resource enhancement: a case of abalone. In:  
699 Kitada S, Kaeriyama M, Hamasaki K, Taniguchi N (eds) *Enhancement and*  
700 *Conservation of Fisheries Resources*, pp. 86–104. Seizando. Tokyo [in Japanese].
- 701 Hamasaki K, Kitada S (2006) A review of kuruma prawn (*Penaeus japonicus*) stock  
702 enhancement programs in Japan. *Fisheries Research* **80**: 80–90.
- 703 Hamasaki K, Kitada S (2008a) The enhancement of abalone stocks: lessons from Japanese  
704 case studies. *Fish and Fisheries* **9**: 243–260.
- 705 Hamasaki K, Kitada S (2008b) Potential of stock enhancement for decapod crustaceans.  
706 *Reviews in Fisheries Science* **16**: 164–174.
- 707 Hamasaki K, Kitada S (2013). Catch fluctuation of Kuruma prawn, *Penaeus japonicus* in  
708 Japan relative to ocean climate variability and a stock enhancement program. *Reviews*  
709 *in Fisheries Science* **21**(3-4): 454–468.
- 710 Hamasaki K, Obata Y, Dan S, Kitada S (2011) A review of seed production and stock  
711 enhancement for commercially important portunid crabs in Japan. *Aquaculture*  
712 *International* **19**: 217–235.

- 713 Hauser L, Carvalho GR (2008) Paradigm shifts in marine fisheries genetics: ugly hypotheses  
714 slain by beautiful facts. *Fish and Fisheries* **9**: 333–362.
- 715 Hayakawa J, Yamakawa T, Aoki I (2007) Long-term fluctuation in the abundance of abalone  
716 and top shell in Japan and factors affecting those fluctuations. *Bulletin of the Japanese*  
717 *Society of Fisheries Oceanography* **71**: 96–105 [In Japanese with English abstract].
- 718 Hilborn R (1992) Hatcheries and the future of salmon in the Northwest. *Fisheries* **17**: 5–8.
- 719 Hilborn R (1998) The economic performance of marine stock enhancement projects. *Bulletin*  
720 *of Marine Science* **62**: 661–674.
- 721 Hilborn R (2004) Population management in stock enhancement and sea ranching. In: Leber  
722 K, Kitada S, Blankenship HL, Svåsand T (eds) *Stock Enhancement and Sea Ranching,*  
723 *Developments Pitfalls and Opportunities*, pp. 201–210. Blackwell, Oxford.
- 724 Hokkaido Salmon Propagation Association (2017) Fifty years of Hokkaido Salmon  
725 Propagation Association. Sapporo [In Japanese].
- 726 Iida M, Yoshino K, Katayama S (2018) Current status of natural spawning of chum salmon  
727 *Oncorhynchus keta* in rivers with or without hatchery stocking on the Japan Seaside of  
728 northern Honshu, Japan. *Fisheries Science* **84**: 453–459.
- 729 Ishino K (1999) Stocking effectiveness of Japanese flounder, *Paralichthys olivaceus*,  
730 fingerlings released on the south-western coast of Hokkaido Prefecture, Japan. In:  
731 Howel BR, Moksness E, Svåsand T (eds) *Stock Enhancement and Sea Ranching*, pp.  
732 557–572. Blackwell, Oxford.
- 733 Kaeriyama M (1999) Hatchery programmes and stock management of salmonid populations  
734 in Japan. In: Howel BR, Moksness E, Svåsand T (eds) *Stock Enhancement and Sea*  
735 *Ranching*, pp. 153–167. Blackwell, Oxford.
- 736 Kaeriyama M, Seo H, Kudo H, Nagata M (2012) Perspectives on wild and hatchery salmon  
737 interactions at sea, potential climate effects on Japanese chum salmon, and the need for

- 738 sustainable salmon fishery management reform in Japan. *Environmental Biology of*  
739 *Fishes* **94**: 165–177.
- 740 Kaeriyama M, Seo H, Qin YX (2014) Effect of global warming on the life history and  
741 population dynamics of Japanese chum salmon. *Fisheries Science* **80**: 251–260.
- 742 Kaeriyama M, Qin YX (2014) Biological interactions between wild and hatchery-produced  
743 Pacific salmon. In Woo PTK, Noakes DJ (eds), *Salmon*, pp. 223–238. Nova Science  
744 Publishers, New York.
- 745 Kasugai K, Saneyoshi H, Aoyama T, Shinriki Y, Iijima A, Miyakoshi Y (2016) Early marine  
746 migration of juvenile chum salmon along the Pacific coast of eastern Hokkaido. *North*  
747 *Pacific Anadromous Fish Commssion Bulletin* **6**: 61–72.
- 748 Kayano Y, Tanaka T, Hayashi H (1998) Observations of artificially releasing seedlings and  
749 native fishes around the marine ranching area. *Fisheries Engineering* **35**: 303–309 [In  
750 Japanese with English abstract].
- 751 Kitada S (1999) Effectiveness of Japan's stock enhancement programs: current perspectives.  
752 In: Howel BR, Moksness E, Svåsand T (eds) *Stock Enhancement and Sea Ranching*, pp.  
753 103–131. Blackwell, Oxford.
- 754 Kitada S (2014) Japanese chum salmon stock enhancement: current perspective and future  
755 challenges. *Fisheries Science* **80**: 237–249.
- 756 Kitada S (2018) Economic, ecological and genetic impacts of marine stock enhancement and  
757 sea ranching: A systematic review. *Fish and Fisheries* **19**: 511–532.
- 758 Kitada S, Fujishima H (1997) The stocking effectiveness of scallop in Hokkaido. *Nippon*  
759 *Suisan Gakkaishi* **63**: 686–693 [In Japanese with English abstract].
- 760 Kitada S, Hiramatsu K, Kishino H (1994) Estimating mortality rates from tag recoveries:  
761 incorporating over-dispersion, correlation, and change points. *ICES Journal of Marine*  
762 *Science* **51**: 241–251.



- 763 Kitada S, Hirano K (1987) Estimation of mortality coefficients from tag recovery. *Nippon*  
764 *Suisan Gakkaishi* **53**: 1765–1770 [In Japanese with English abstract].
- 765 Kitada S, Kishino H (2006) Lessons learned from Japanese marine finfish stock enhancement  
766 programmes. *Fisheries Research* **80**: 101–112.
- 767 Kitada S, Kishino H (2019) Fitness decline in hatchery-enhanced salmon populations is  
768 manifested by global warming. <http://biorxiv.org/cgi/content/short/828780v1>
- 769 Kitada S, Nakajima K, Hamasaki K, Shishidou H, Waples RS, Kishino H (2019) Rigorous  
770 monitoring of a large-scale marine stock enhancement program demonstrates the need  
771 for comprehensive management of fisheries and nursery habitat. *Scientific Reports* **9**:  
772 5290.
- 773 Kitada S, Nakamichi R, Kishino H (2017) The empirical Bayes estimators of fine-scale  
774 population structure in high gene flow species. *Molecular Ecology Resources* **17**:  
775 1210–1222.
- 776 Kitada S, Okouchi H (1994) A simulation model for strategies of hatchery releases with  
777 application to red sea bream. *Nippon Suisan Gakkaishi* **60**: 235–240 [In Japanese with  
778 English abstract].
- 779 Kitada S, Shishidou H, Sugaya T, Kitakado T, Hamasaki K, Kishino H (2009) Genetic effects  
780 of long-term stock enhancement programs. *Aquaculture* **290**: 69–79.
- 781 Kitada S, Taga Y, Kishino H (1992) Effectiveness of a stock enhancement program evaluated  
782 by a two-stage sampling survey of commercial landings. *Canadian Journal of Fisheries*  
783 *and Aquatic Sciences* **49**: 1573–1582.
- 784 Kitada S, Yoshikai R, Fujita T, Hamasaki K, Nakamichi R, Kishino H (2017) Population  
785 structure and persistence of Pacific herring following the Great Tohoku earthquake.  
786 *Conservation Genetics* **18**: 423–437.
- 787 Kojima H (1995) Evaluation of abalone stock enhancement through the release of

- 788 hatchery-reared seeds. *Marine and Freshwater Research* **46**: 689–695.
- 789 Kondo H, Hirano Y, Nakayama N, Miyake M (1965) Offshore distribution and migration of  
790 Pacific salmon (genus *Oncorhynchus*) based on tagging studies (1958-1961). *Bulletin of*  
791 *International North Pacific Fisheries Commission* **17**: 1–213.
- 792 Koya Y (2005) Stock enhancement of barfin flounder in Hokkaido. *Technical Reports of*  
793 *Hokkaido Fisheries Experimental Station* **5**: 43–49 [In Japanese].
- 794 Kudo K, Kimoto H (1994) Fishery management of marine ranching in the Oita prefectural sea  
795 area. *Fisheries Engineering* **31**:121–126 [In Japanese with English abstract].
- 796 Kurata M (1999) On the decline in the growth of maricultured scallop, *Patinopecten*  
797 *yessoensis*, in the Okhotsk coastal area of Hokkaido. *Research Reports of Hokkaido*  
798 *Fisheries Experimental Station* **54**: 25–32 [In Japanese].
- 799 Laikre L, Schwartz MK, Waples RS, Ryman N, GeM working group (2010) Compromising  
800 genetic diversity in the wild: Unmonitored large-scale release of plant and animals.  
801 *Trends in Ecology and Evolution* **25**: 520–529.
- 802 Le Vay L, Carvalho GR, Quintio ET, Leбата JH, Ut VN, Fushimi H (2007) Quality of  
803 hatchery-reared juveniles for marine fisheries stock enhancement. *Aquaculture* **268**  
804 (1-4): 169–180.
- 805 Lee SI, Zhang CI (2018) Evaluation of the effect of marine ranching activities on the  
806 Tongyeong marine ecosystem. *Ocean Science Journal* **53**: 557–582.
- 807 Lee S G, Rahman MA (2018) Ecological stock enhancement programs (ESEPs) based  
808 fisheries rebuilding plan (FRP) in Korea. *Journal of Environmental Biology* **39**:  
809 936–942.
- 810 Masuda R, Tsukamoto K (1998) Stock enhancement in Japan: review and perspective.  
811 *Bulletin of Marine Science* **62**: 337–358.
- 812 Matsuishi T, Kishino H, Numachi K (1995) A model of gene displacement by stocking

- 813 activities. *Nippon Suisan Gakkaishi* **61**: 326–330 [In Japanese with English abstract].
- 814 Matsumura Y (2005) Optimal release strategy of hatchery-produced ocellate puffer *Takifugu*  
815 *rubripe* in Ariake Sound by mark-recapture experiments, based on the stocking  
816 effectiveness for young-of-the-year. *Nippon Suisan Gakkaishi* **71**: 805–814 [In Japanese  
817 with English abstract].
- 818 Matsumura Y (2006) Stocking effectiveness of hatchery-produced juveniles of ocellate puffer  
819 *Takifugu rubripe* in natal spawning ground of Ariake Sound. *Nippon Suisan Gakkaishi*  
820 **72**: 1029–1038 [In Japanese with English abstract].
- 821 McGinnity P, Prodöhl P, Ferguson A, Hynes R, ó Maoiléidigh N, Baker N et al. (2003) Fitness  
822 reduction and potential extinction of wild populations of Atlantic salmon, *Salmo salar*,  
823 as a result of interactions with escaped farm salmon. *Proceedings of the Royal Society*  
824 *of London B* **270**: 2443–2450.
- 825 Ministry of Agriculture, Forestry and Fisheries (MAFF) (1964–2018) *Annual statistics of*  
826 *fisheries and aquaculture production in 1966–2019*. Association of Agriculture and  
827 Forestry Statistics, Tokyo [in Japanese].
- 828 Miyakoshi Y, Nagata M, Sugiwaka KI, Kitada S (2001) Commercial harvest of  
829 hatchery-reared masu salmon *Oncorhynchus masou* estimated by a coast-wide sampling  
830 program in Hokkaido, northern Japan, and the two-stage sampling schemes of landings.  
831 *Fisheries Science* **67**: 126–133.
- 832 Miyakoshi Y, Urabe H, Saneyoshi H, Aoyama T, Sakamoto H, Ando D et al. (2012) The  
833 occurrence and run timing of naturally spawning chum salmon in northern Japan.  
834 *Environmental Biology of Fishes* **94**: 197–206.
- 835 Miyakoshi Y, Nagata M, Kitada S, Kaeriyama M (2013) Historical and current hatchery  
836 programs and management of chum salmon in Hokkaido, northern Japan. *Reviews in*  
837 *Fisheries Science* **21**: 469–479.

- 838 Moksness E, Støle R (1997) Larviculture of marine fish for sea ranching purposes: is it  
839 profitable? *Aquaculture* **155**: 341–353.
- 840 Moksness E, Støle R, van der Meeren G (1998) Profitability analysis of sea ranching with  
841 Atlantic salmon (*Salmo salar*), Arctic charr (*Salvelinus alpinus*), and European lobster  
842 (*Homarus gammarus*) in Norway. *Bulletin of Marine Science* **62**: 689–699.
- 843 Morita K (2014) Japanese wild salmon research: toward a reconciliation between hatchery  
844 and wild salmon management. *NPAFC Newsletter* **35**: 4–14.
- 845 Morita K (2016) Trends in Russian chum salmon populations. *FRA Salmonid Research*  
846 *Report* **10**, 38–40 [In Japanese].
- 847 Morita K, Saito T, Miyakoshi Y, Fukuwaka MA, Nagasawa T, Kaeriyama M (2006) A review  
848 of Pacific salmon hatchery programmes on Hokkaido Island, Japan. *ICES Journal of*  
849 *Marine Science* **63**: 1353–1363.
- 850 Morita K, Takahashi S, Ohkuma K, Nagasawa T (2013) Estimation of the proportion of wild  
851 chum salmon *Oncorhynchus keta* in Japanese hatchery rivers. *Nippon Suisan Gakkaishi*  
852 **79**, 206–213 [In Japanese with English abstract].
- 853 Murakami O (2012) Effect of large-scale release of barfin flounder in the western Pacific  
854 Hokkaido. *Reports of Hokkaido Fisheries Experimental Station* **706** [In Japanese].
- 855 Nagata M, Miyakoshi Y, Urabe H, Fujiwara M, Sasaki Y, Kasugai K et al. (2012) An  
856 overview of salmon enhancement and the need to manage and monitor natural  
857 spawning in Hokkaido, Japan. *Environmental Biology of Fishes* **94**: 311–323.
- 858 Naish KA, Taylor III JE, Levin PS, Quinn TP, Winton JR, Huppert D et al. (2007) An  
859 evaluation of the effects of conservation and fishery enhancement hatcheries on wild  
860 populations of salmon. *Advances in Marine Biology* **53**: 61–194.
- 861 Nakagawa M, Okouchi H, Adachi J (2004) Stocking effectiveness of black rockfish *Sebastes*  
862 *schlegeli* released in Yamada Bay evaluated by a fish market census. In: Leber K,

- 863 Kitada S, Blankenship HL, Svåsand T (eds) *Stock Enhancement and Sea Ranching,*  
864 *Developments Pitfalls and Opportunities*, pp. 501–511. Blackwell, Oxford.
- 865 Nakajima H, Kai M, Koizumi K, Tanaka T, Machida M (2008) Optimal release locations of  
866 juvenile ocellate puffer *Takifugu rubripes* identified by tag and release experiments.  
867 *Reviews in Fisheries Science*: **16**(1-3), 228–234.
- 868 Nakajima K, Kitada S, Yamazaki H, Takemori H, Obata Y, Iwamoto A et al. (2013)  
869 Ecological interactions between hatchery and wild fish: a case study based on the  
870 highly piscivorous Japanese Spanish mackerel. *Aquaculture Environment Interactions*  
871 **3**: 231–243.
- 872 Nakajima K, Kitada S, Habara Y, Sano S, Yokoyama E, Sugaya T et al. (2014) Genetic effects  
873 of marine stock enhancement: a case study based on the highly piscivorous Japanese  
874 Spanish mackerel. *Canadian Journal of Fisheries and Aquatic Sciences* **71**: 301–314.
- 875 Nakamura A, Kitada S, Hamasaki K, Okouchi H (2005) Catch fluctuation in *Haliotis* spp.  
876 abalones: annual landings of the Ezo abalone *Haliotis discus hannai* in relation to  
877 climate oscillation and stock enhancement programs. *Saibai Gyogyo Gijyutsu Kaihatsu*  
878 *Kenkyu* **33**: 45–54 [In Japanese with English abstract].
- 879 Nei M, Chesser RK (1983) Estimation of fixation indices and gene diversities. *Annals of*  
880 *Human Genetics* **47**: 253–259.
- 881 Nishihama Y (2001) *Scallop fisheries in the Okhotsk Sea*. Hokkaido University Press,  
882 Sapporo [in Japanese].
- 883 North Pacific Anadromous Fish Commission (NPAFC) (2019) *NPAFC Pacific salmonid catch*  
884 *and hatchery release data (updated 2019 summer)*. NPAFC, Vancouver, BC. Retrieved  
885 from <http://www.npafc.org>
- 886 North Pacific Japan Stock Enhancement Council (NPJSEC) (2015) Barfin flounder  
887 enhancement plan 2015–2021. Fisheries Agency [In Japanese].

- 888 Obata Y, Imai H, Kitakado T, Hamasaki K, Kitada S (2006) The contribution of stocked mud  
889 crabs *Scylla paramamosain* to commercial catches in Japan, estimated using a genetic  
890 stock identification technique. *Fisheries Research* **80**: 113–121.
- 891 Obata Y, Iwamoto A, Takemori H, Yamazaki H, Okumura S, Fujimoto H et al. (2007) A  
892 comparison of survival rates until recruitment for hatchery-released Japanese Spanish  
893 mackerel *Scomberomorus niphonius* with different sizes at release. *Nippon Suisan*  
894 *Gakkaishi* **73**: 55–61 [In Japanese with English abstract].
- 895 Obata Y, Yamazaki H, Iwamoto A, Hamasaki K, Kitada S (2008) Evaluation of stocking  
896 effectiveness of the Japanese Spanish mackerel in the eastern Seto Inland Sea, Japan.  
897 *Reviews in Fisheries Science* **16**: 35–24.
- 898 Ohnuki T, Morita K, Tokuda H, Okamoto Y, Ohkuma K (2015) Numerical and economic  
899 contributions of wild and hatchery pink salmon to commercial catches in Japan  
900 estimated from mass otolith markings. *North American Journal of Fisheries*  
901 *Management* **35**: 598–604.
- 902 Okamoto K (2004) Juvenile release and market size recapture of the swimming crab *Portunus*  
903 *trituberculatus* (Miers) marked with coded wire tags. In: Leber K, Kitada S,  
904 Blankenship HL, Svåsand T (eds) *Stock Enhancement and Sea Ranching, Developments*  
905 *Pitfalls and Opportunities*, pp. 181–186. Blackwell, Oxford.
- 906 Okouchi H, Kitada S, Tsuzaki T, Fukunaga T, Iwamoto A (1999) Number of returns and  
907 economic return rates of hatchery-released flounder *Paralichthys olivaceus* in Miyako  
908 Bay – Evaluation by a fish market census. In: Howel BR, Moksness E, Svåsand T (eds)  
909 *Stock Enhancement and Sea Ranching*, pp. 573–582. Blackwell, Oxford.
- 910 Okouchi H, Kitada S, Iwamoto A, Fukunaga T (2004) The flounder stock enhancement in in  
911 Miyako Bay. *FAO Fisheries Technical Paper* **429**: 171–202.

- 912 Okouchi H, Kitada S, Morioka T, Imamura S (1994) A comparison of the quality of  
913 hatchery-reared red sea bream *Pagrus major* based on mortality rate estimated from tag  
914 recoveries. *Nippon Suisan Gakkaishi* **60**: 229–233 [in Japanese with English abstract].
- 915 Quinn TP (1993) A review of homing and straying of wild and hatchery-produced salmon.  
916 *Fisheries Research* **18**(1-2): 29–44.
- 917 Reisenbichler RR, McIntyre JD (1977) Genetic differences in growth and survival of juvenile  
918 hatchery and wild steelhead trout, *Salmo gairdneri*. *Journal of the Fisheries Board of*  
919 *Canada* **34**: 123–128.
- 920 Roberge C, Normandeau E, Einum S, Guderley H, Bernatchez L (2008) Genetic  
921 consequences of interbreeding between farmed and wild Atlantic salmon: insights from  
922 the transcriptome. *Molecular Ecology* **17**: 314–324.
- 923 Sakai Y, Tajima K, Agatsuma Y (2004) Stock enhancement of the short-spined sea urchin. In:  
924 Leber K, Kitada S, Blankenship HL, Svåsand T (eds) *Stock Enhancement and Sea*  
925 *Ranching, Developments Pitfalls and Opportunities*, pp. 465–476. Blackwell, Oxford.
- 926 Sakano E (1960) Results from marking experiments on young chum salmon in Hokkaido,  
927 1951–1959. *Scientific Reports of the Hokkaido Salmon Hatchery* **15**: 17–38 [in Japanese  
928 with English Abstract].
- 929 Sato S, Templin WD, Seeb LW, Seeb JE, Urawa S (2014) Genetic structure and diversity of  
930 Japanese chum salmon populations inferred from single-nucleotide polymorphism  
931 markers. *Transactions of the American Fisheries Society* **143**: 1231–1246.
- 932 Shiota K, Kitada S (1992) Life history of swimming crab in Hiuchi Nada, Seto Inland Sea  
933 estimated from marking experiments. *Nippon Suisan Gakkaishi* **58**: 2297–2302 [in  
934 Japanese with English abstract].
- 935 Shishidou H (2002) Stocking effectiveness of red sea bream *Pagrus major* in Kagoshima Bay.  
936 *Fisheries Science* **68** (Suppl I): 904–907.

- 937 Shishidou H, Kitada S (2007) Stocking effectiveness of red sea bream *Pagrus major* in  
938 Kagoshima Bay, Japan. *Nippon Suisan Gakkaishi* **73**: 270–277 [in Japanese with  
939 English abstract].
- 940 Shishidou H, Takimoto A, Obata Y, Hamasaki K, Kitada S (2012) Stock assessment and  
941 release strategy of red sea bream *Pagrus major* in Kagoshima Bay, Japan. *Nippon*  
942 *Suisan Gakkaishi* **78**: 161–170 [in Japanese with English abstract].
- 943 Sproul JT, Tominaga O (1992) An economic review of the Japanese flounder stock  
944 enhancement project in Ishikari Bay, Hokkaido. *Bulletin of Marine Science* **50**: 75–88.
- 945 Steward CR, Bjornn TC (1990) Supplementation of salmon and steelhead stocks with  
946 hatchery fish: A synthesis of published literature. *U.S. Fish and Wildlife Services,*  
947 *Technical Reports* **90** (1), 202 p.
- 948 Svåsand T, Kristiansen TS, Pedersen T, Salvanes AV, Engelsen R, Naevdal G et al. (2000) The  
949 enhancement of cod stocks. *Fish and Fisheries* **1**: 173–205.
- 950 Takaba M, Kitada S, Nakano H, Morioka T (1995) Survival, feeding activity and liver  
951 constituents of red sea bream released into the Seto Inland Sea of Japan with special  
952 reference to fish quality. *Nippon Suisan Gakkaishi* **61**: 574–579 [in Japanese with  
953 English abstract].
- 954 Takami H, Saido T, Endo T, Noro T, Musashi T, Kawamura T (2008) Overwinter mortality of  
955 young-of-the-year Ezo abalone in relation to seawater temperature on the North Pacific  
956 coast of Japan. *Marine Ecology Progress Series* **367**: 203–212.
- 957 Takeuchi T (2001) A review of feed development for early life stages of marine finfish in  
958 Japan. *Aquaculture* **200**(1–2): 203–222.
- 959 Taniguchi N (2003) Genetic factors in broodstock management for seed production. *Reviews*  
960 *in Fish Biology and Fisheries* **13**: 177–185.
- 961 Taniguchi N (2004) Broodstock management for stock enhancement programs of marine fish



- 962 with assistance of DNA markers (a review). In: Leber K, Kitada S, Blankenship HL,  
963 Svåsand T (eds) *Stock Enhancement and Sea Ranching, Developments Pitfalls and*  
964 *Opportunities*, pp. 329–338. Blackwell, Oxford.
- 965 Taylor MD, Chick RC, Lorenzen K, Agnalt AL, Leber KM, Blankenship HL et al. (2017)  
966 Fisheries enhancement and restoration in a changing world. *Fisheries Research* **186**:  
967 407–412.
- 968 Tillotson MD, Barnett HK, Bhuthimethee M, Koehler ME, Quinn TP (2019) Artificial  
969 selection on reproductive timing in hatchery salmon drives a phenological shift and  
970 potential maladaptation to climate change. *Evolutionary Applications* **12**: 1344–1359.
- 971 Tominaga O, Watanabe Y (1998) Geographical dispersal and optimum release size of  
972 hatchery-reared Japanese flounder *Paralichthys olivaceus* released in Ishikari Bay,  
973 Hokkaido, Japan. *Journal of Sea Research* **40**(1–2): 73–81.
- 974 Tomiyama T, Watanabe M, Fujita T (2008) Community-based stock enhancement and  
975 fisheries management of the Japanese flounder in Fukushima, Japan. *Reviews in*  
976 *Fisheries Science* **16**(1–3): 146–153.
- 977 Tsujimura H (2007) Stocking effectiveness of red spotted grouper in Osaka Bay.  
978 [www.kannousuiken-osaka.or.jp](http://www.kannousuiken-osaka.or.jp) [In Japanese].
- 979 Tsukamoto K, Kuwada H, Uchida K, Masuda R, Sakakura A (1999) Fish quality and stocking  
980 effectiveness: behavioural approach. In: Howel BR, Moksness E, Svåsand T (eds) *Stock*  
981 *Enhancement and Sea Ranching*, pp. 203–218. Blackwell, Oxford.
- 982 Uki N (2006) Stock enhancement of the Japanese scallop *Patinopecten yessoensis* in  
983 Hokkaido. *Fisheries Research* **80**: 62–66.
- 984 Wada T, Kamiyama K, Shimamura S, Mizuno T, Nemoto Y (2012) Effectiveness of stock  
985 enhancement of a rare species, spotted halibut *Verasper variegatus*, in Fukushima,  
986 Japan. *Aquaculture* **364**: 230–239.

- 987 Wang Y, Yu J, Chen P (2018) Remote sensing assessment of ecological effects of marine  
988 ranching in the eastern Guangdong waters, China. *Journal of Geoscience and*  
989 *Environment Protection* **6**: 101–113.
- 990 Waples RS (1991) Genetic interactions between hatchery and wild salmonids: lessons from  
991 the Pacific Northwest. *Canadian Journal of Fisheries and Aquatic Sciences* **48** (S1),  
992 124–133.
- 993 Waples RS (1999) Dispelling some myths about hatcheries. *Fisheries* **24**: 12–21.
- 994 Waples RS, Drake J (2004) Risk/benefit considerations for marine stock enhancement: A  
995 Pacific salmon perspective. In: Leber K, Kitada S, Blankenship HL, Svåsand T (eds)  
996 *Stock Enhancement and Sea Ranching, Developments Pitfalls and Opportunities*, pp.  
997 260–306. Blackwell, Oxford.
- 998 Waples RS, Gaggiotti O (2006) What is a population? An empirical evaluation of some  
999 genetic methods for identifying the number of gene pools and their degree of  
1000 connectivity. *Molecular Ecology* **15**: 1419–1439.
- 1001 Winton J, Hilborn R (1994) Lessons from supplementation of chinook salmon in British  
1002 Columbia. *North American Journal of Fisheries Management* **14**: 1–13.
- 1003 Yamaguchi T, Ito S, Hamasaki K, Kitada S (2006) Stocking effectiveness of hatchery-released  
1004 kuruma prawns estimated by two-stage sampling of commercial catch in Ariake Sound,  
1005 Japan. *Fisheries Science* **72**: 233–238.
- 1006 Zhou X, Zhao X, Zhang S, Lin J (2019) Marine ranching construction and management in  
1007 East China Sea: Programs for sustainable fishery and aquaculture. *Water* **11**: 1237.

1008

## 1009 **Supporting Information**

1010 Additional Supporting Information may be found in the online version of this article:

1011

1012 **Supporting Data**

1013 Catch and release data for major species in Japanese marine stock enhancement and sea  
1014 ranching programmes and the results of marking experiments with chum salmon conducted in  
1015 Hokkaido in the 1950s.  
1016

## 1017 **Figure Legends**

1018

1019 **Figure 1** Changes in tidal flat and eel grass (*Zostera marina*) areas (1945–1996). From the  
1020 Ministry of Environment, [www.env.go.jp](http://www.env.go.jp) and [www.biodic.go.jp](http://www.biodic.go.jp), accessed July 2019.

1021

1022 **Figure 2** Maps showing the locations of marine and salmon hatcheries in Japan operated by  
1023 different sectors. From FRA ([salmon.fra.affrc.go.jp](http://salmon.fra.affrc.go.jp), accessed August 2019) and National  
1024 Association for Promotion of Productive Seas (<http://www.yutakanaumi.jp/>, see text).

1025

1026 **Figure 3** Forest plot of recapture rates from large-scale hatchery releases in Japan. Thin lines  
1027 indicate 95% confidence intervals, with arrows (in the case of Japanese scallop and sea  
1028 urchin) indicating that the confidence intervals penetrate the scale. Areas of the squares are  
1029 proportional to the weight of the mean.

1030

1031 **Figure 4** Performance of large-scale hatchery releases in Japan. Forest plots of (a)  
1032 yield-per-release (YPR), (b) economic efficiency, and (c) YPR vs. economic efficiency. Note:  
1033 the seed cost used in the analysis did not include personnel expenses, facilities, monitoring, or  
1034 administration costs. SIS = Seto Inland Sea.

1035

1036 **Figure 5** Total catch and recovery from releases of representative species in Japanese  
1037 stocking programmes for all of Japan. Vertical lines depict recovery (expected catch from  
1038 releases), which were estimated by multiplying values of yield-per-release (YPR) (see Table  
1039 A2) and the numbers released (Supplementary Data). For sea urchin, no YPR data were  
1040 available.

1041

1042 **Figure 6** Long-term release and catch (return) statistics for (a) Japanese scallop (updated  
1043 from Kitada 2018) and (b) chum salmon in Hokkaido (updated from Miyakoshi et al. 2013)  
1044 (see Supplementary Data).

1045

1046 **Figure 7** Gene flow between Japanese populations of chum salmon. Populations with  
1047 pairwise  $F_{ST} < 0.01$ , as estimated from microsatellite data of 26 populations (14 loci,  $n = 6$   
1048 028; Beacham et al. 2008), are connected by lines.

1049

## 1050 **Appendices**

**Table A1** Recapture rates of 21 major marine stock enhancement and sea ranching programmes in Japan

| Species<br>(Broodstock,<br>Type)        | Geographic<br>al region      | Years for<br>calculating<br>recapture<br>rate | Size at<br>release<br>size (cm) | Number<br>released    | Marking<br>methods <sup>†</sup>       | Estimation<br>methods <sup>‡</sup>                         | Recapture<br>rate $\pm$ SD<br>(%) | Source                                                                             |
|-----------------------------------------|------------------------------|-----------------------------------------------|---------------------------------|-----------------------|---------------------------------------|------------------------------------------------------------|-----------------------------------|------------------------------------------------------------------------------------|
| Barfin flounder<br>(Captive, III)       | East-wester<br>n Hokkaido    | 1987–                                         | 8                               | Million/year<br>2006– | EAT, ALC,<br>no marking<br>since 2000 | SCFM, all<br>landings were<br>regarded as<br>released fish | 12.1 $\pm$ 0.6                    | Koya (2005)<br>Murakami (2012);<br>NPJSEC (2015)                                   |
| Black rockfish<br>(Captive, III)        | Yamada<br>Bay, Iwate         | 1995–1997                                     | 8.7–12.9                        | 447,394               | Removal of<br>ventral fins            | SCFM                                                       | 11.8 $\pm$ 0.9                    | Nakagawa et al.<br>(2004)                                                          |
| Chum salmon<br>(Returned adults,<br>II) | Hokkaido                     | 1974–2017                                     | 5 g                             | 1.0<br>billion/year   | Otolith<br>thermal<br>marking,<br>ALC | No. returned (4<br>years after)/<br>No. released           | 3.6 $\pm$ 1.2                     | FRA,<br><a href="http://hnf.fra.affrc.go.jp/">http://hnf.fra.affrc<br/>.go.jp/</a> |
| Japanese flounder<br>(Captive, III)     | Fukushima                    | 1987                                          | 10                              | 246,000               | PES                                   | SCFM, a<br>two-stage<br>sampling<br>method                 | 15.0 $\pm$ 3.3                    | Kitada et al.<br>(1992)                                                            |
| Japanese flounder<br>(Captive, III)     | Fukushima                    | 1994–2002                                     | 10                              | 8,260,000             | PES                                   | SCFM                                                       | 12.1 $\pm$ 4.8                    | Tomiyama et al.<br>(2008)                                                          |
| Japanese flounder<br>(Captive, III)     | Ishikari<br>Bay,<br>Hokkaido | 1989                                          | 6.0–7.8                         | 149,555               | PES, EAT,<br>FC                       | SCFM<br>Reported<br>recapture                              | 5.7 $\pm$ 3.5                     | Tominaga &<br>Watanabe (1998)                                                      |
| Japanese flounder<br>(Captive, III)     | Kagoshima<br>Bay             | 1989–1995                                     | 8.6–10.5                        | 2,189,000             | PES                                   | SCFM                                                       | 2.4 $\pm$ 0.7                     | Atsuchi &<br>Masuda (2004)                                                         |

|                                      |                           |           |                      |                    |                 |                             |                                            |                                              |
|--------------------------------------|---------------------------|-----------|----------------------|--------------------|-----------------|-----------------------------|--------------------------------------------|----------------------------------------------|
| Japanese flounder (Captive, III)     | Miyako Bay, Iwate         | 1986–1992 | 7.9 (7.0–9.3)        | 611,000            | Ratex and brand | SCFM with fish census       | 14.5 ± 7.3                                 | Okouchi et al. (1999); Okouchi et al. (2004) |
| Japanese flounder (Captive, III)     | Southern Hokkaido         | 1987–1993 | 7–15.5               | 1,069,000          | EAT, PES        | SCFM                        | 10.4                                       | Ishino (1999)                                |
| Japanese Spanish mackerel (Wild, II) | Eastern Seto Inland Sea   | 2002–2003 | 10.6 ± 1.7           | 160,122            | ALC             | SCFM                        | 15.0 ± 0.7                                 | Yamazaki et al., 2007; Obata et al. (2008)   |
| Red sea bream (Captive, III)         | Kagoshima Bay             | 1974–     | 6.0–7.0              | 0.5–1.3 million/yr | DIE             | SCFM                        | 8.0 ± 4.2                                  | Shishidou (2002); Kitada & Kishino (2006)    |
| Red sea bream (Captive, III)         | Sagami Bay, Kanagawa      | 1978–     | 6.0–7.0              | 0.8–1.2 million/yr | EAT, DIE        | Reported recapture and SCFM | 7.1 ± 2.9                                  | Kitada & Kishino (2006)                      |
| Red spotted grouper (Captive, III)   | Osaka Bay, Osaka          | 2000–2007 | 10                   | 4,000/yr           | EAT             | Reported recapture          | 2.2 ± 1.0 (1.5–3.4)                        | Tsujimura (2007)                             |
| Spotted halibut (Captive, III)       | Fukushima                 | 1993–2007 | 7.5–51.0             | 426,704            | Dart tag, ALC   | SCFM                        | 11.1 ± 11.4                                | Wada et al. (2012)                           |
| Tiger puffer (Captive, III)          | Ariake Sea, Kyushu Island | 1991–2003 | 0.3–10.2             | 1,313,450          | ALC, TC         | SCFM (for matured fish)     | 11.6 ± 7.0 (Age0+)<br>0.2 ± 0.1 (spawners) | Matsumura (2005; 2006)                       |
| Tiger puffer (Captive, III)          | Mie, Aichi, Shizuoka      | 2001–2005 | 7.7 ± 1.6 (5.6–10.0) | 452,839            | VIE             | SCFM                        | 5.1 ± 6.5                                  | Nakajima et al. (2008)                       |

|                                           |                               |           |                 |                   |                                                   |                                                 |             |                             |
|-------------------------------------------|-------------------------------|-----------|-----------------|-------------------|---------------------------------------------------|-------------------------------------------------|-------------|-----------------------------|
| Kuruma prawn (Wild, II)                   | Western Japan coasts          | 1980–1991 | 2.3 ± 0.6       | 1,261,039         | CWT, UC                                           | SCFM                                            | 2.8 ± 4.5   | Hamasaki & Kitada (2006)    |
| Mud crab (Wild, II)                       | Urado Bay, Kochi              | 1997–2001 | 0.9–1.5 (C3–C5) | 475,300           | GEN                                               | Genetic mixing proportion                       | 0.9 ± 0.7   | Obata et al. (2006)         |
| Swimming crab (Wild, II)                  | Lake Hamana, Shizuoka         | 1998      | 2.2             | 3,300             | CWT                                               | SCFM                                            | 1.2         | Okamoto (2004)              |
| Abalone (Captive, III)                    | Over Japan coasts             | 1980–1991 | 2.3 ± 0.6       | 1,261,039         | GM                                                | SCFM                                            | 12.2 ± 8.1  | Hamasaki & Kitada (2008a)   |
| Japanese scallop (Wild spat collected, I) | Okhotsk Sea coast, Hokkaido   | 1870s–    | 4.5             | Over 3 billion/yr | No marking                                        | Regression analysis                             | 34.5 ± 10.2 | Kitada and Fujishima (1997) |
| Short-spined sea urchin (Wild, II)        | Tomari, and Akkeshi, Hokkaido | 1987–1998 | 0.8–1.8         | 1,961,000         | Width of the first ring (FR) in the genital palte | SCFM, Discrimination from FR size distributions | 18.2 ± 17.5 | Sakai et al. (2004)         |

1051 † EAT, external anchor and T-bar tag; ALC, alizarin complexone on otolith; TC, oxytetracycline on otolith; GEN, genetic marking;

1052 PES, pigmentation of eyeless side; FC, fin clipping; VIE, visual implant elastomer; DIE, deformity of internostril epidermis;

1053 UC; uropod cutting. GM; green mark on shells due to hatchery diet.

1054 ‡SCFM, sampling survey of commercial landings at fish markets.

**Table A2** Performance of 15 major marine stock enhancement and sea ranching programmes in Japan

| Species                   | Geographical region     | Marking methods <sup>†</sup> | Estimation Method <sup>‡</sup> | Recapture rate (%) | YPR <sup>§</sup> (g) | Economic efficiency <sup>¶</sup> | Source                                                     |
|---------------------------|-------------------------|------------------------------|--------------------------------|--------------------|----------------------|----------------------------------|------------------------------------------------------------|
| Barfin flounder           | East-western Hokkaido   | -                            | YPR                            | 12.1 ± 0.6         | 181.5 ± 9.0          | 2.7 ± 0.1                        | This study ( $w=1500$ , $v=1.2$ , $c=81$ )                 |
| Chum salmon               | Hokkaido                | -                            | YPR                            | 3.6 ± 1.2          | 118.5 ± 45.1         | 18.9 ± 7.2                       | Kitada (2018); This study ( $w=3310$ , $v=0.4$ , $c=2.5$ ) |
| Japanese flounder         | Kagoshima Bay           | PES                          | SCFM                           | 2.4 ± 0.7          | 29.7 ± 2.6           | 1.1 ± 0.1                        | Atsuchi & Masuda (2004); Kitada & Kishino (2006)           |
| Japanese flounder         | Miyako Bay              | PES                          | CS                             | 13.5 ± 6.4         | 51.8 ± 24.2          | 1.6 ± 0.7                        | Okouchi et al. (2004); Kitada & Kishino (2006)             |
| Japanese flounder         | Fukushima coast         | PES                          | SCFM                           | 12.1 ± 4.8         | n.a                  | 0.9 ± 0.4                        | Tomiya et al. (2008)                                       |
| Japanese Spanish mackerel | Eastern Seto Inland Sea | ALC                          | SCFM                           | 15.0 ± 0.7         | 169.7 ± 8.3          | 1.0 ± 0.1                        | Obata et al. (2008)                                        |
| Red sea bream             | Kagoshima Bay           | DIE                          | SCFM                           | 8.0 ± 4.2          | 59.0 ± 27.2          | 5.0 ± 2.7                        | Shishidou (2002); Kitada & Kishino (2006)                  |
| Red sea bream             | Sagami Bay              | DIE                          | SCFM                           | 7.1 ± 2.9          | 54.9 ± 30.4          | 1.4 ± 0.3                        | Kitada & Kishino (2006)                                    |
| Red spotted grouper       | Osaka Bay, Osaka        | EAT                          | MR                             | 2.2 ± 1.0          | 7.7 ± 0.4            | 0.3 ± 0.01                       | Tsujimura (2007); This study ( $w=350$ , $v=5$ , $c=150$ ) |



|                  |                           |             |      |                      |             |                      |                                                                                      |
|------------------|---------------------------|-------------|------|----------------------|-------------|----------------------|--------------------------------------------------------------------------------------|
| Tiger puffer     | Ariake Sea, Kyushu Island | ALC, TC     | YPR  | 11.6 ± 7.0 (Age0+)   | n.a         | 2.4 (Age0+ spawners) | Matsumura (2005; 2006)                                                               |
|                  |                           |             |      | 0.2 ± 0.1 (spawners) |             |                      |                                                                                      |
| Kuruma prawn     | Western coasts            | UC, CWT     | SCFM | 2.8 ± 4.5            | 0.9 ± 1.5   | 0.7 ± 0.9            | Hamasaki & Kitada (2006, 2008b)                                                      |
| Mud crab         | Urado Bay, Kochi          | GEN (mtDNA) | SCFM | 0.9 ± 0.7            | 3.7 ± 3.0   | 1.9 ± 1.5            | Obata et al. (2006), Hamasaki et al. (2011)                                          |
| Swimming crab    | Lake Hamana, Shizuaoka    | CWT         | SCFM | 1.2                  | 1.5         | n.a                  | Okamoto (2004)                                                                       |
| Swimming crab    | Seto Inland Sea           | -           | REG  | 17                   | 33.6 ± 9.5  | 1.0 ± 0.3            | Hamasaki et al. (2011)<br>This study ( $v=0.15$ , $c=5$ )                            |
| Abalone          | Over coast of Japan       | GM          | SCFM | 12.2 ± 8.1           | 25.6 ± 19.1 | 3.5 ± 2.4            | Hamasaki & Kitada (2008a)                                                            |
| Japanese scallop | Okhotsk coast, Hokkaido   | -           | YPR  | 34.5 ± 10.2          | 60.9 ± 18.0 | 17.9 ± 5.3           | Kitada & Fujishima (1997); Kurata (1999); This study ( $w=176.5$ , $v=0.9$ , $c=3$ ) |

1055 †EAT, external anchor and T-bar tag; ALC, alizarin complexone on otolith; TC, oxytetracycline on otolith; GEN, genetic marking; PES, pigmentation of eyeless side; DIE, deformity of internostril epidermis; UC, uropod clipping; CWT, coded-wire tags; GM, green mark on the shell.

1058 ‡SCFM, sampling survey of commercial landings at fish markets; CS, census of commercial landings; MR, mark-recapture; REG, regression analysis; YPR, yield per release.

1060 § Grams of fish caught per individual released.

1061 ¶ Ratio of net income to release cost, excluding personnel expenses, expenditure for hatchery facilities, and monitoring costs;

1062 n.a, not analysed.

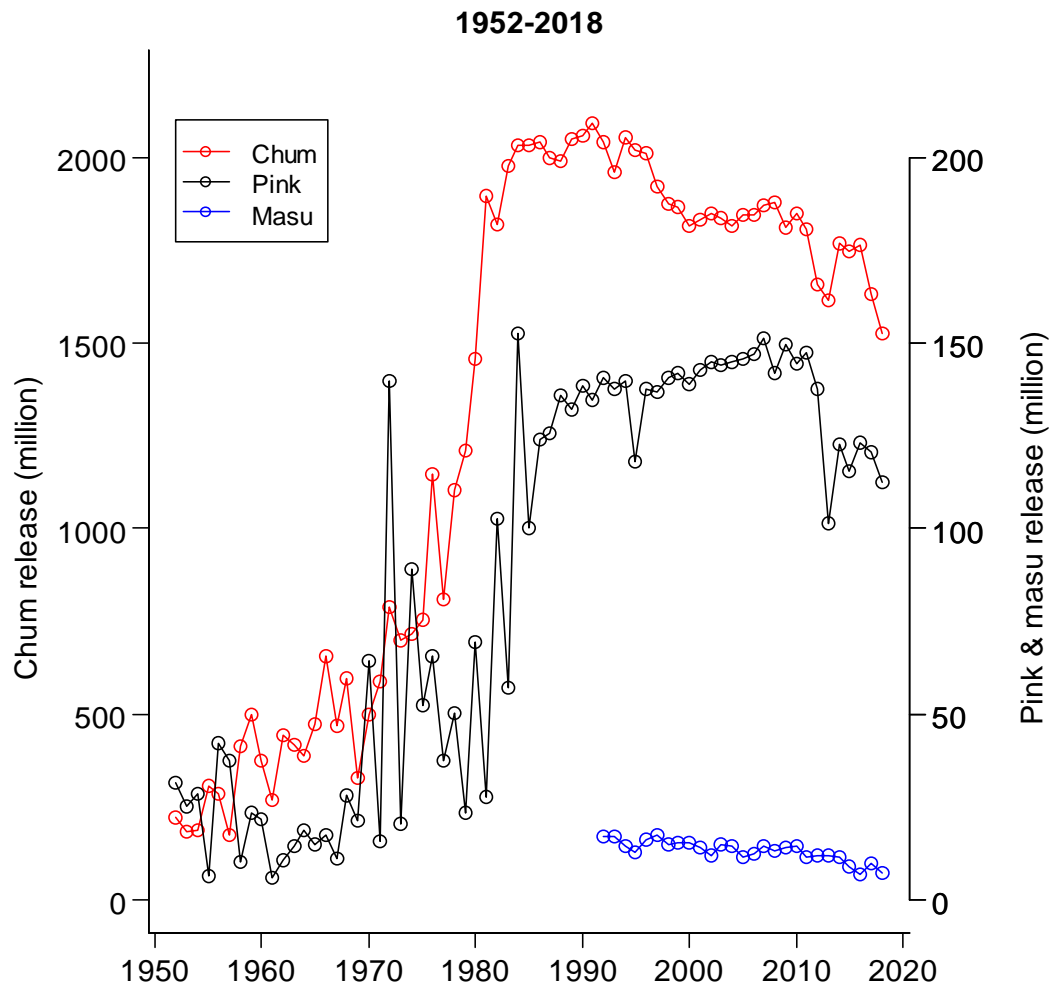

1063

1064 **Figure A1** Number of released juveniles of chum, pink, and masu salmon in Japan

1065 (1952–2018). Data from the North Pacific Anadromous Fish Commission ([www.npafc.org](http://www.npafc.org),

1066 accessed August 2019).

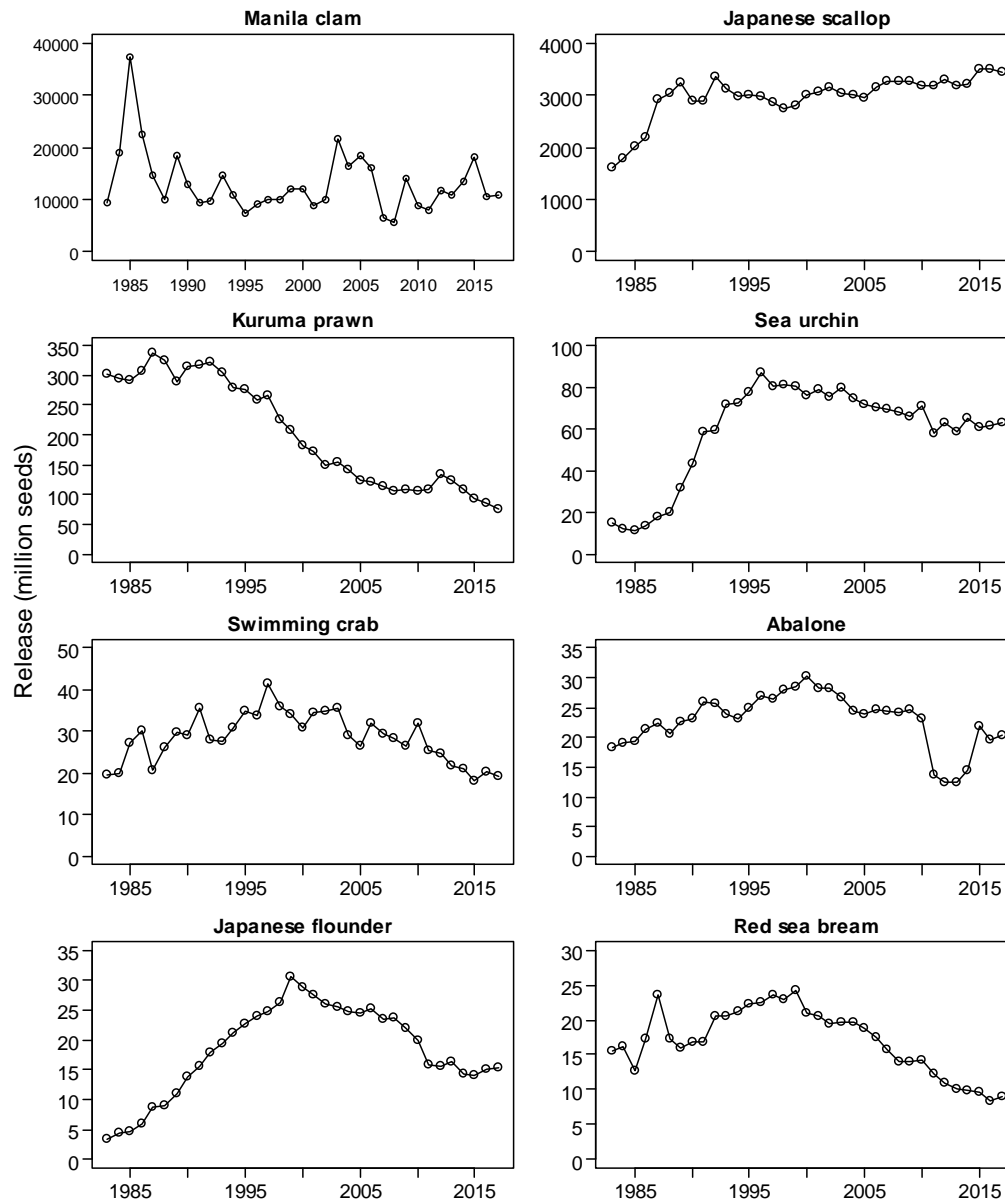

1067

1068 **Figure A2** Number of released seeds of the top eight species of Japanese marine stock  
1069 enhancement and sea ranching programmes (1983–2017). Data from the Fisheries Agency,  
1070 Fisheries Research and Education Agency, and National Association for Promotion of  
1071 Productive Seas (1985–2019).

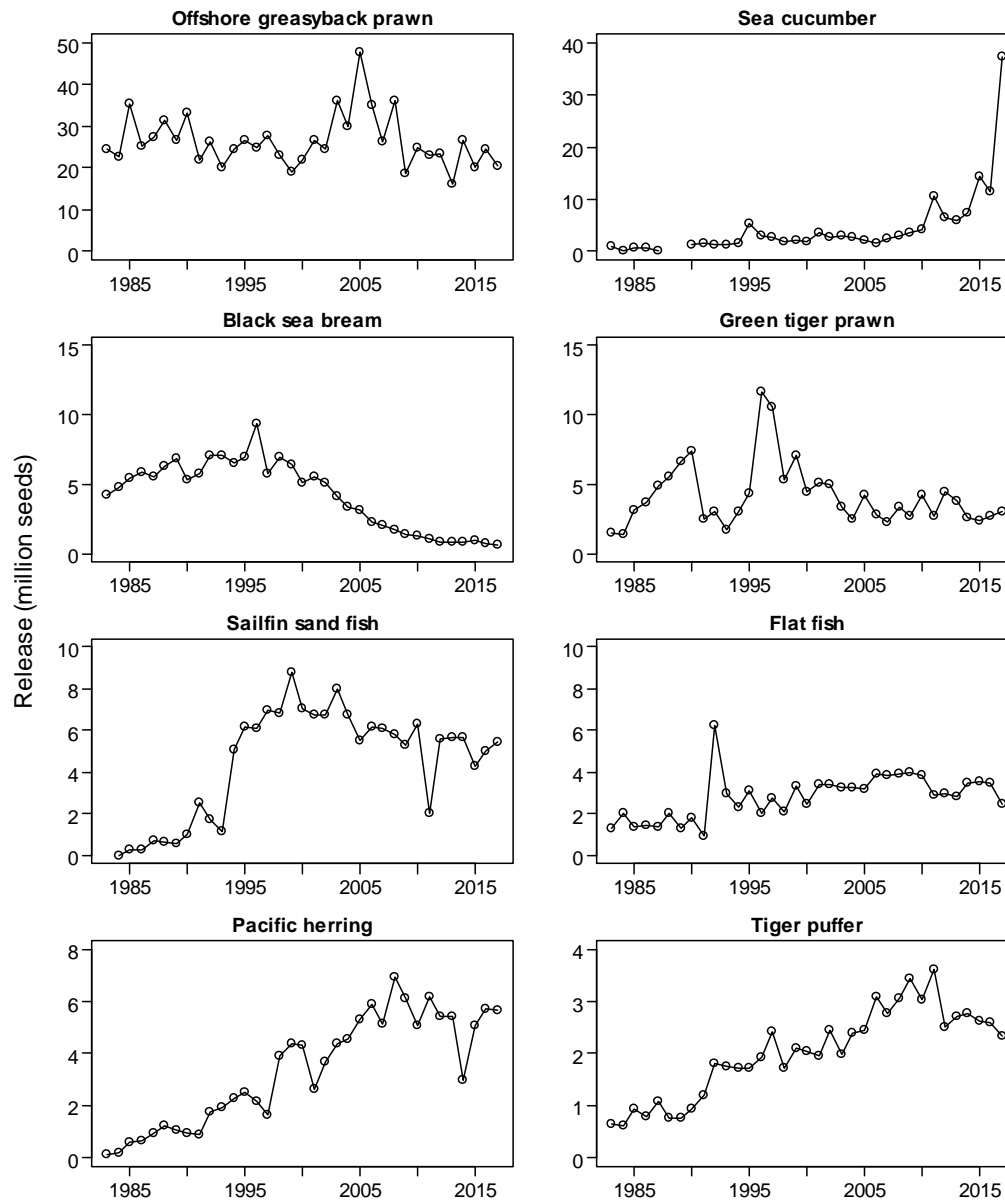

1072

1073 **Figure A3** Number of released seeds of 9th–16th-ranked target species of Japanese marine

1074 stock enhancement and sea ranching programmes (1983–2017). Data from the Fisheries

1075 Agency, FRA, and NAPPS (1985–2019).

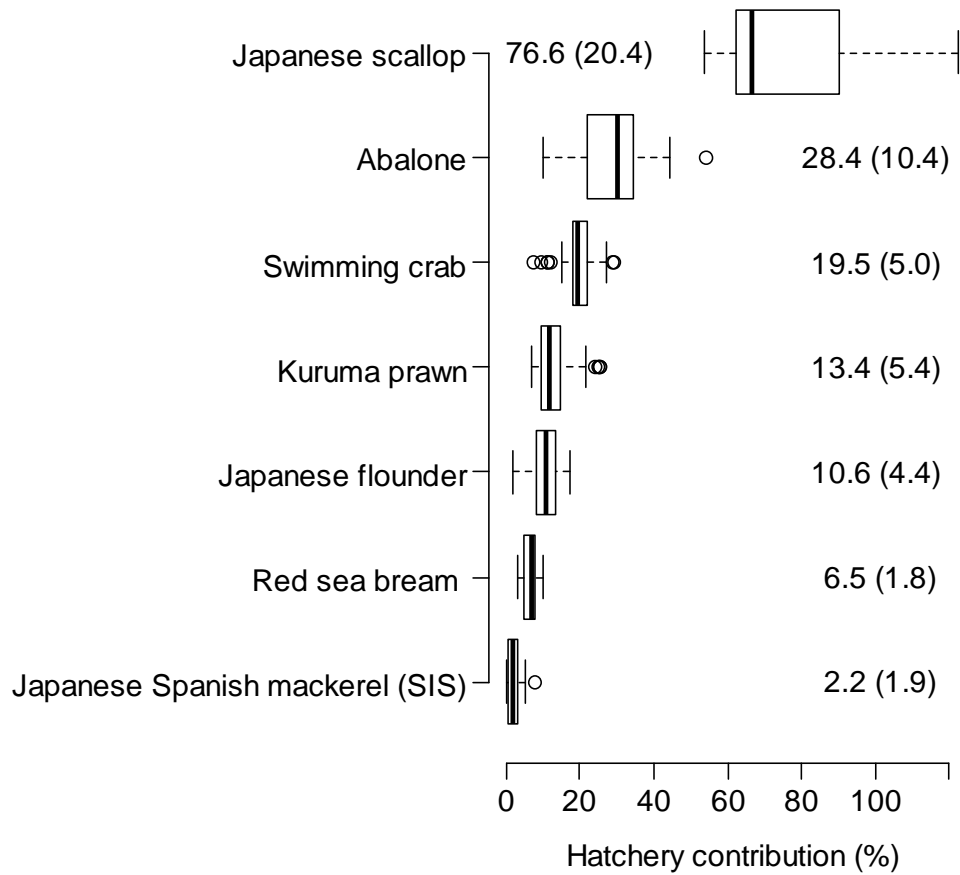

1076

1077 **Figure A4** Percent contribution of hatchery-reared individuals to the commercial catch,

1078 calculated from Figure 5.

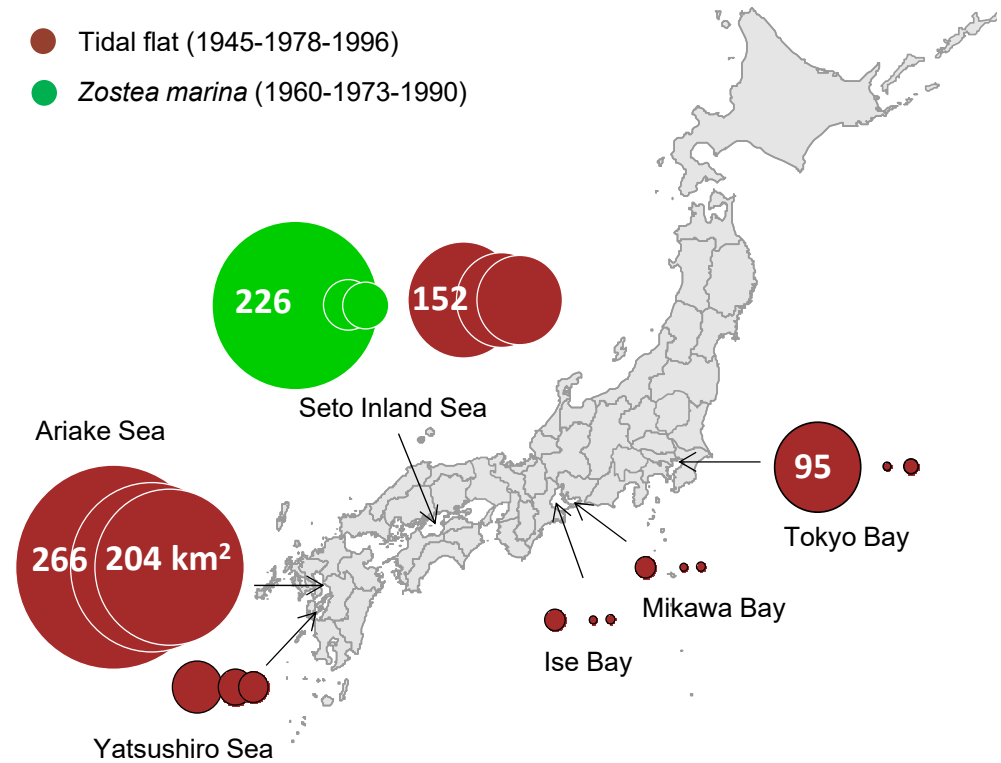

Fig. 1

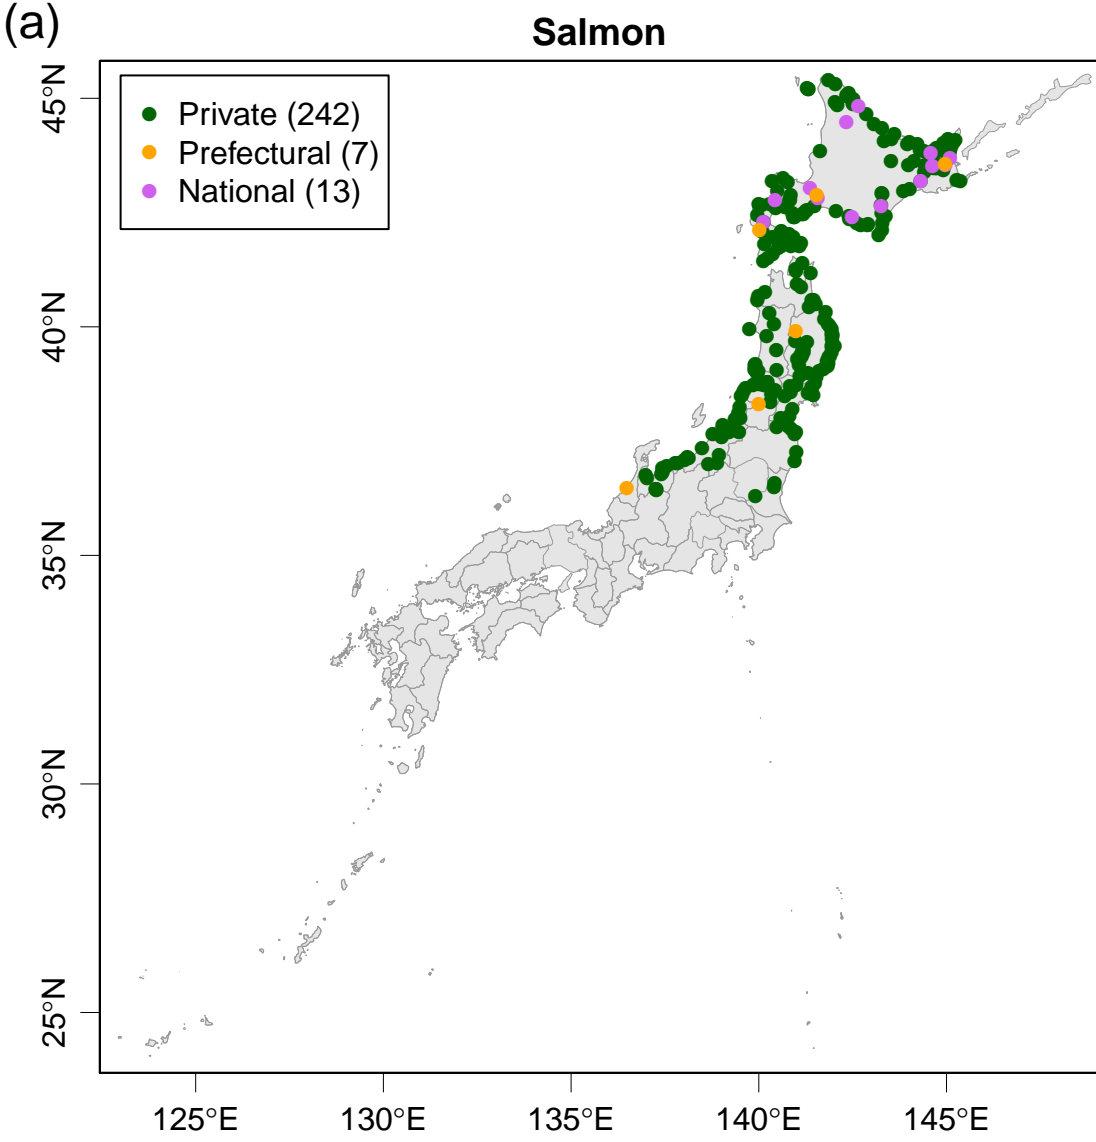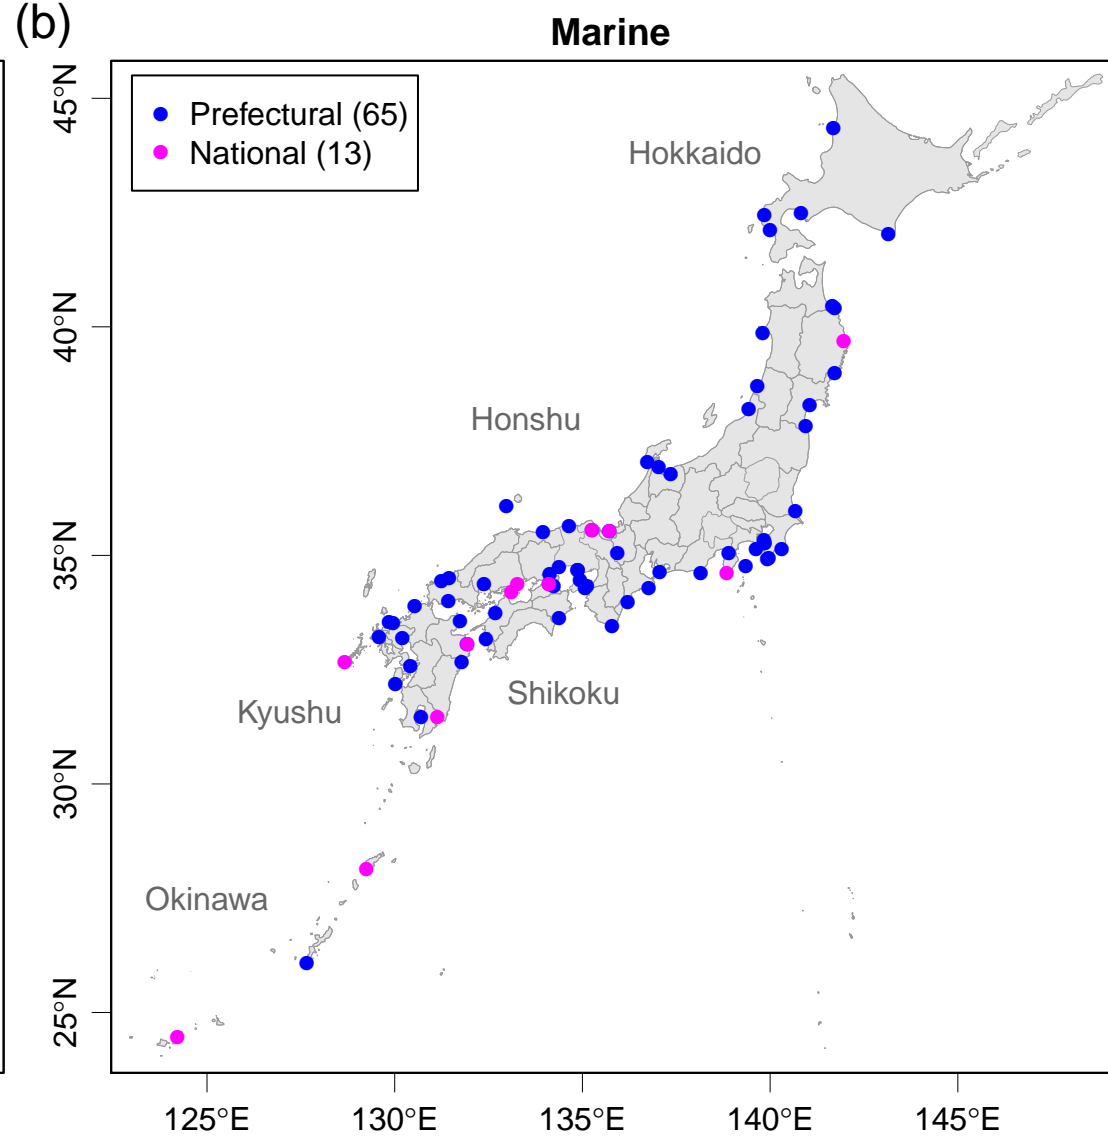

## Recapture rates (%)

### Species

### Mean (SD)

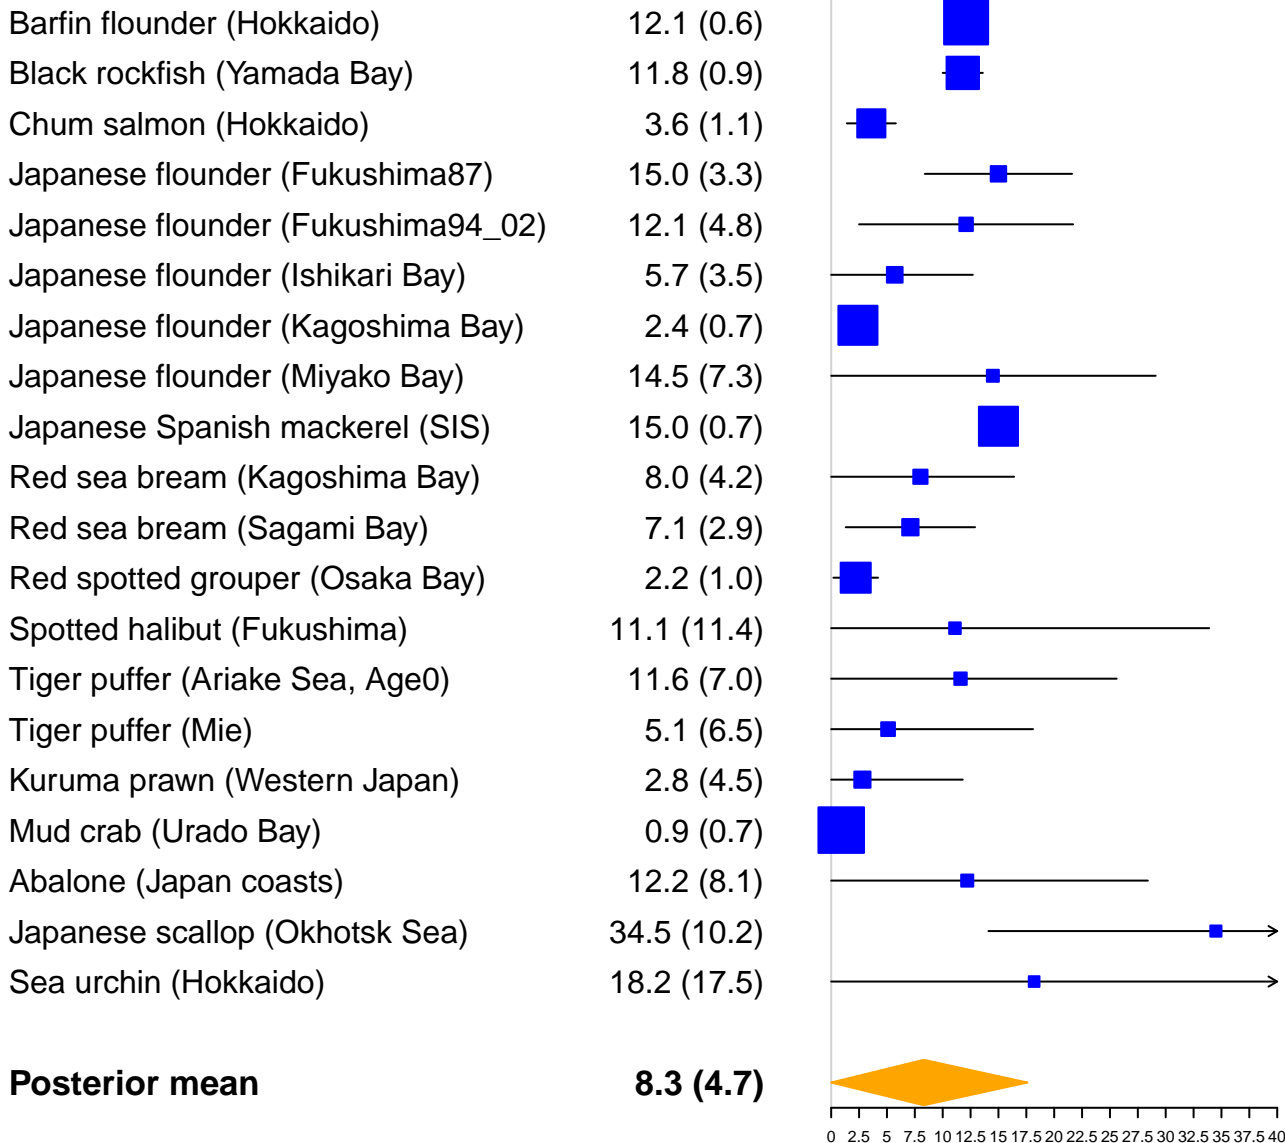

0 2.5 5 7.5 10 12.5 15 17.5 20 22.5 25 27.5 30 32.5 35 37.5 40



# YPR (g)

## Species

## Mean (SD)

Barfin flounder (Hokkaido) 181.5 (9.0)

Chum salmon (Hokkaido) 118.5 (45.1)

Japanese flounder (Kagoshima Bay) 29.7 (2.6)

Japanese flounder (Miyako Bay) 51.8 (24.2)

Japanese Spanish mackerel (SIS) 169.7 (8.3)

Red sea bream (Kagoshima Bay) 59.0 (27.2)

Red sea bream (Sagami Bay) 54.9 (30.4)

Kuruma prawn (Western Japan) 0.9 (1.5)

Mud crab (Urado Bay) 3.7 (3.0)

Swimming crab (SIS) 33.6 (9.5)

Abalone (Japan coasts) 25.6 (19.1)

Japanese scallop (Okhotsk Sea) 60.9 (18)

## Posterior mean

64.9 (74.1)

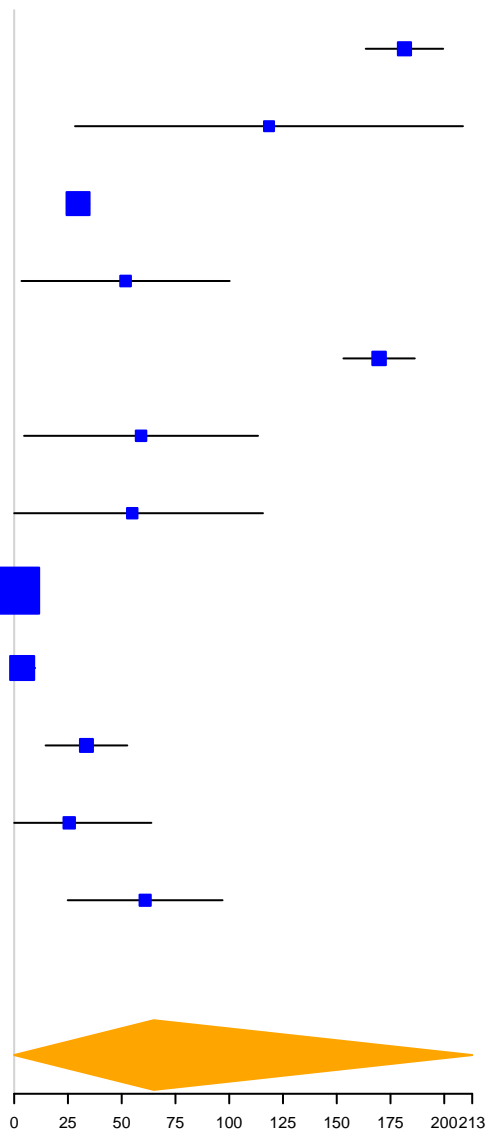

# Economic efficiency

## Species

## Mean (SD)

Barfin flounder (Hokkaido)

2.7 (0.1)

Chum salmon (Hokkaido)

18.9 (7.2)

Japanese flounder (Fukushima94\_02)

0.9 (0.4)

Japanese flounder (Kagoshima Bay)

1.1 (0.1)

Japanese flounder (Miyako Bay)

1.6 (0.7)

Japanese Spanish mackerel (SIS)

1.0 (0.1)

Red sea bream (Kagoshima Bay)

5.0 (2.7)

Red sea bream (Sagami Bay)

1.4 (0.3)

Kuruma prawn (Western Japan)

0.7 (0.9)

Mud crab (Urado Bay)

1.9 (1.5)

Swimming crab (SIS)

1.0 (0.3)

Abalone (Japan coasts)

3.5 (2.4)

Japanese scallop (Okhotsk Sea)

17.9 (5.3)

## Posterior mean

2.8 (6.1)

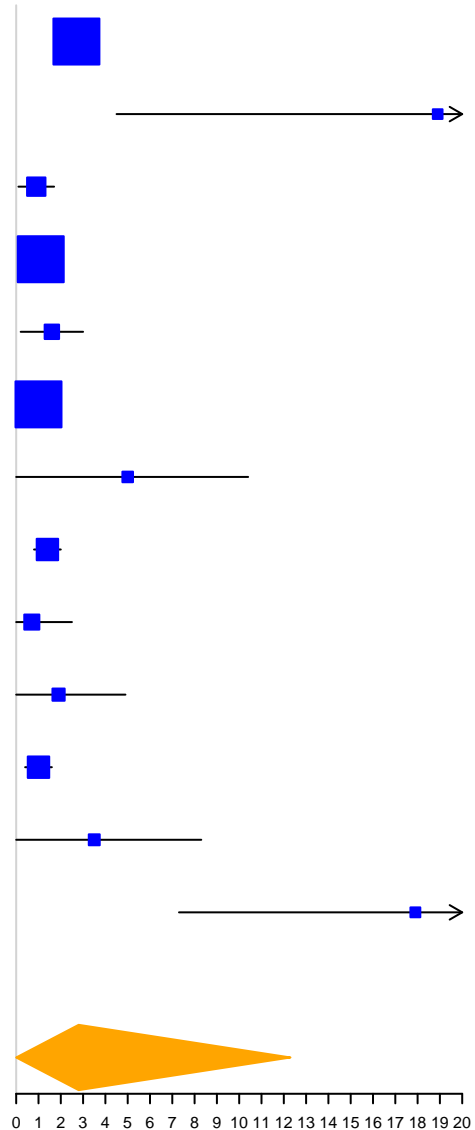

(c)

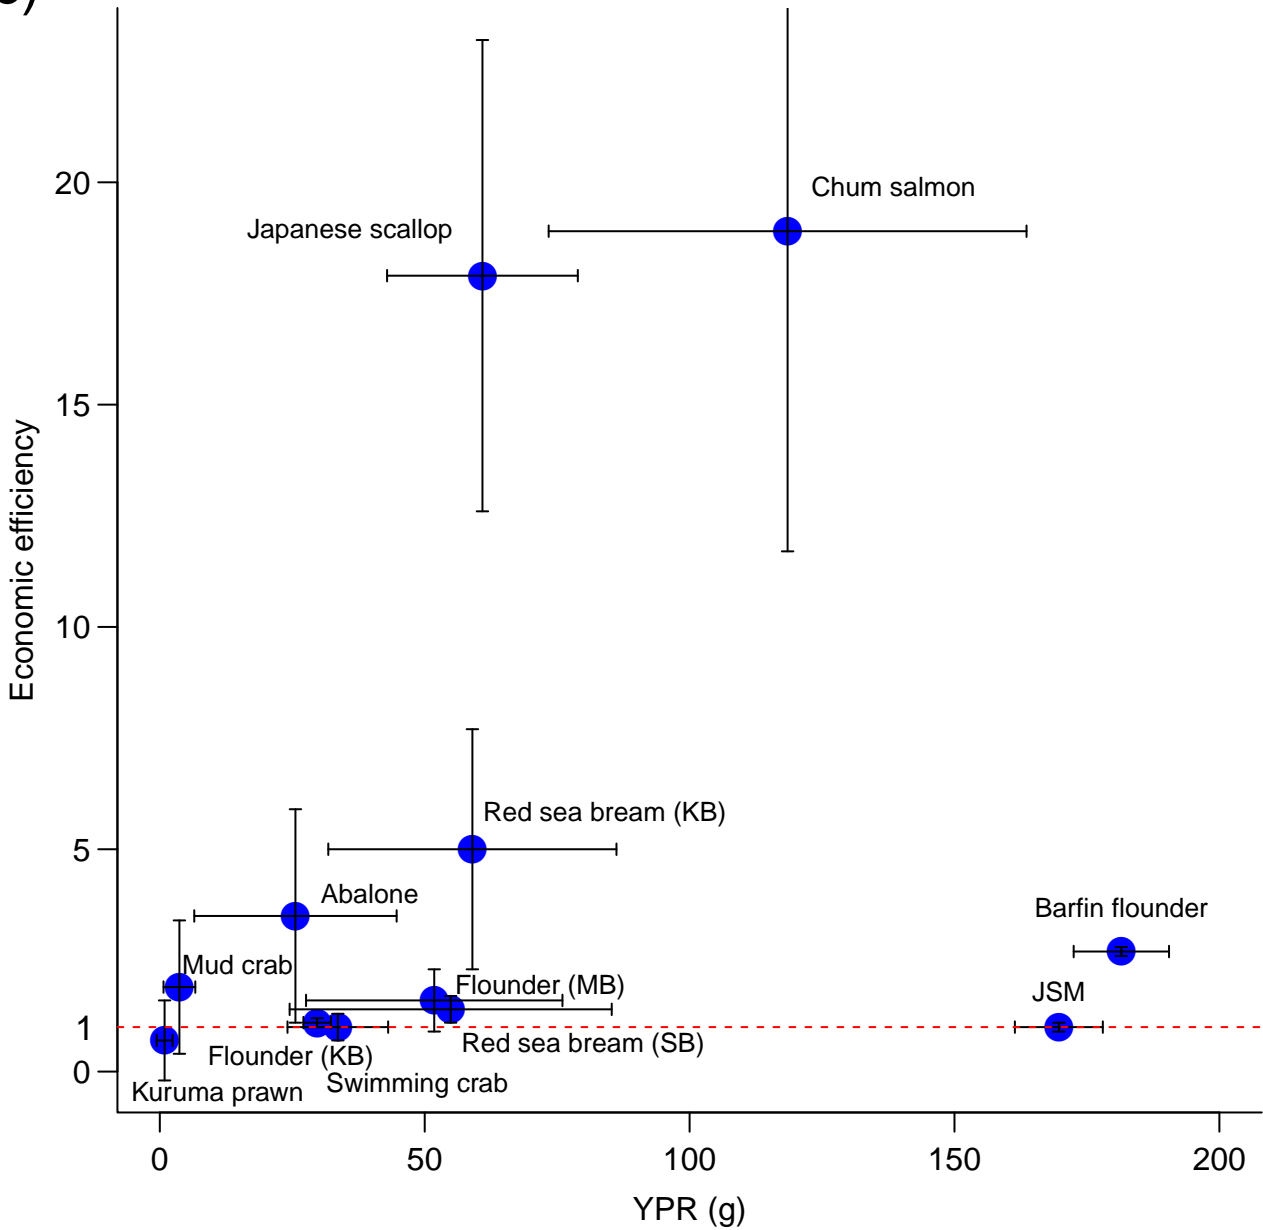

**Japanese scallop**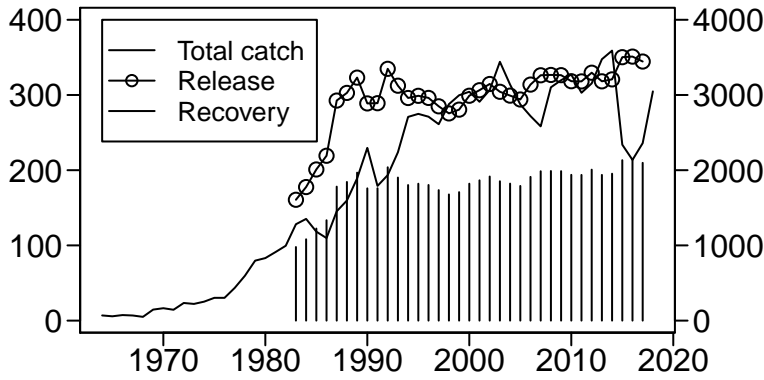**Japanese flounder**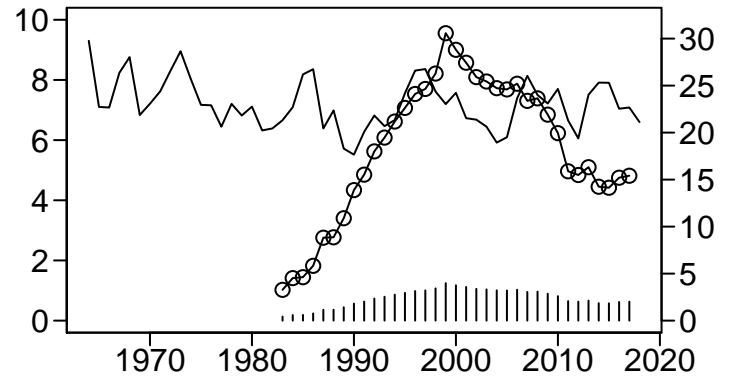**Red sea bream**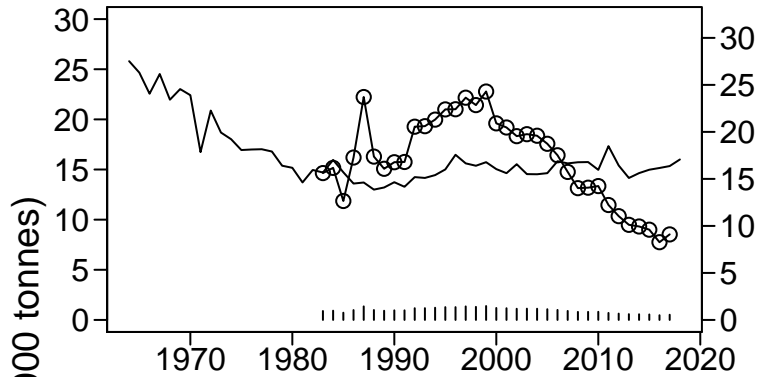**Japanese Spanish mackerel (SIS)**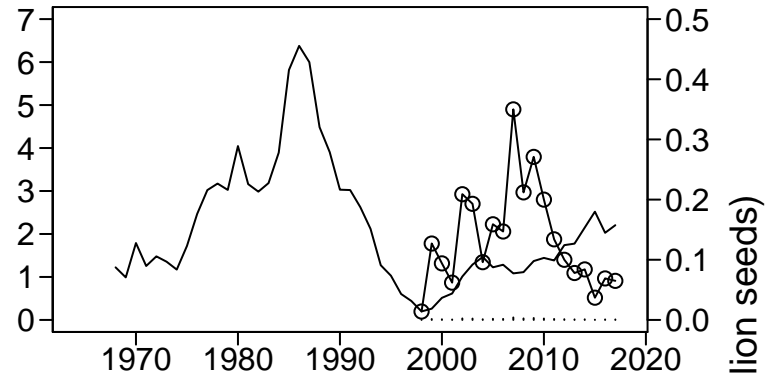**Kuruma prawn**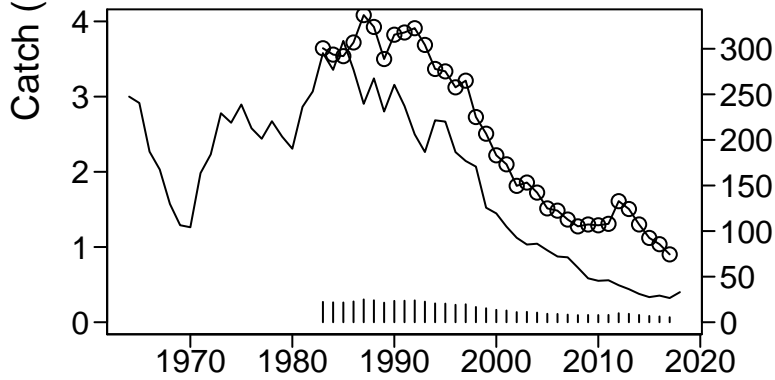**Swimming crab**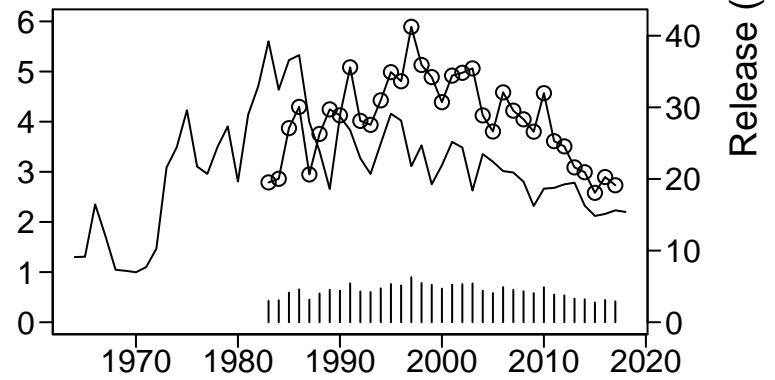**Abalone**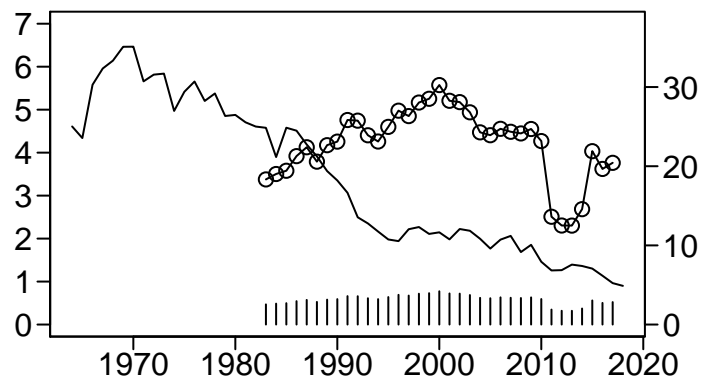**Sea urchin**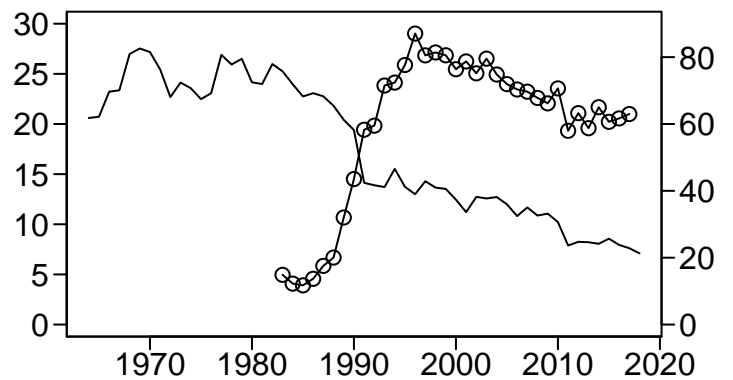

(a)

### Hokkaido scallop (1910–2018)

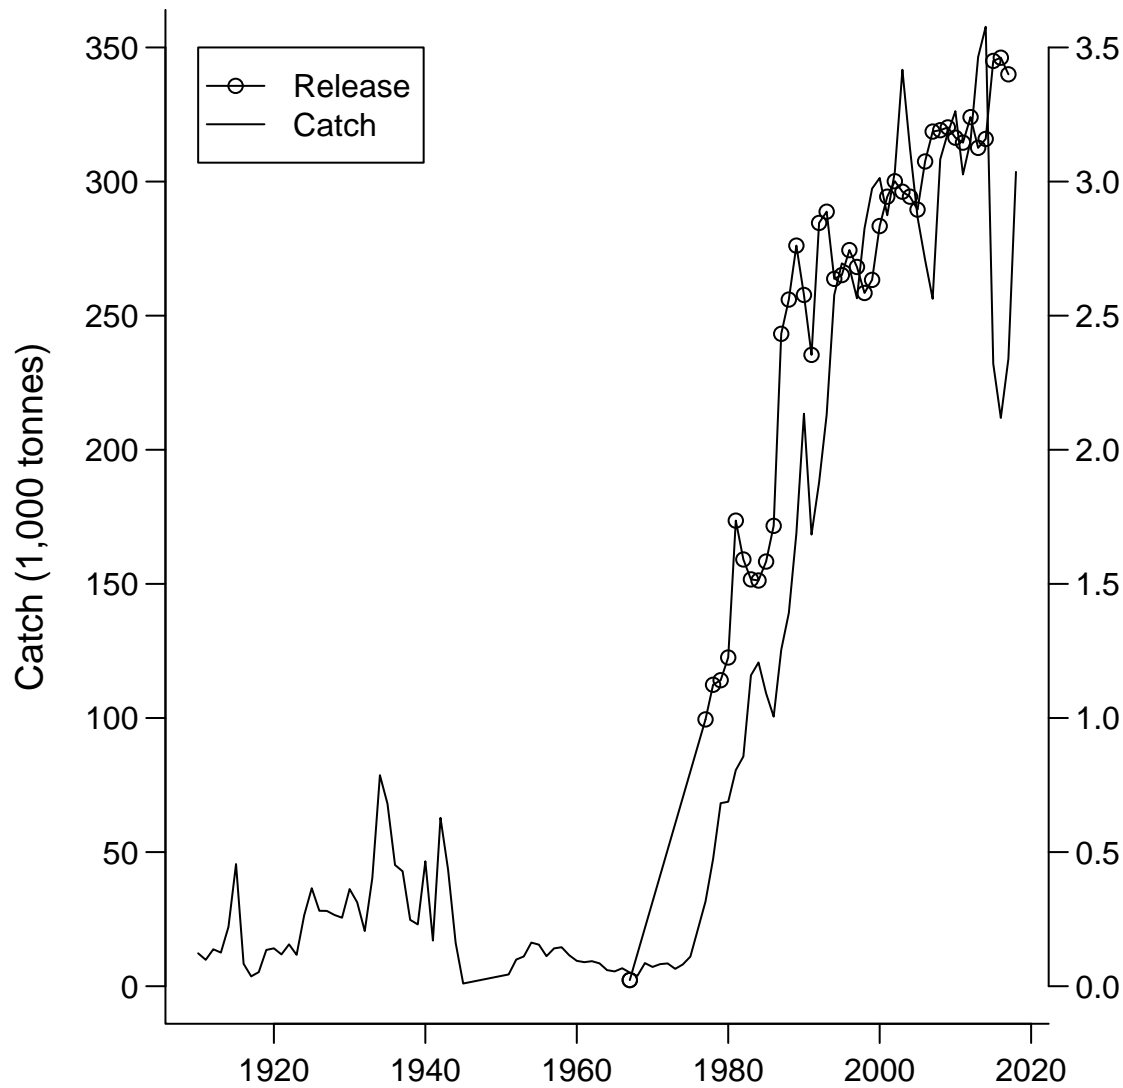

(b)

### Hokkaido chum salmon (1870–2018)

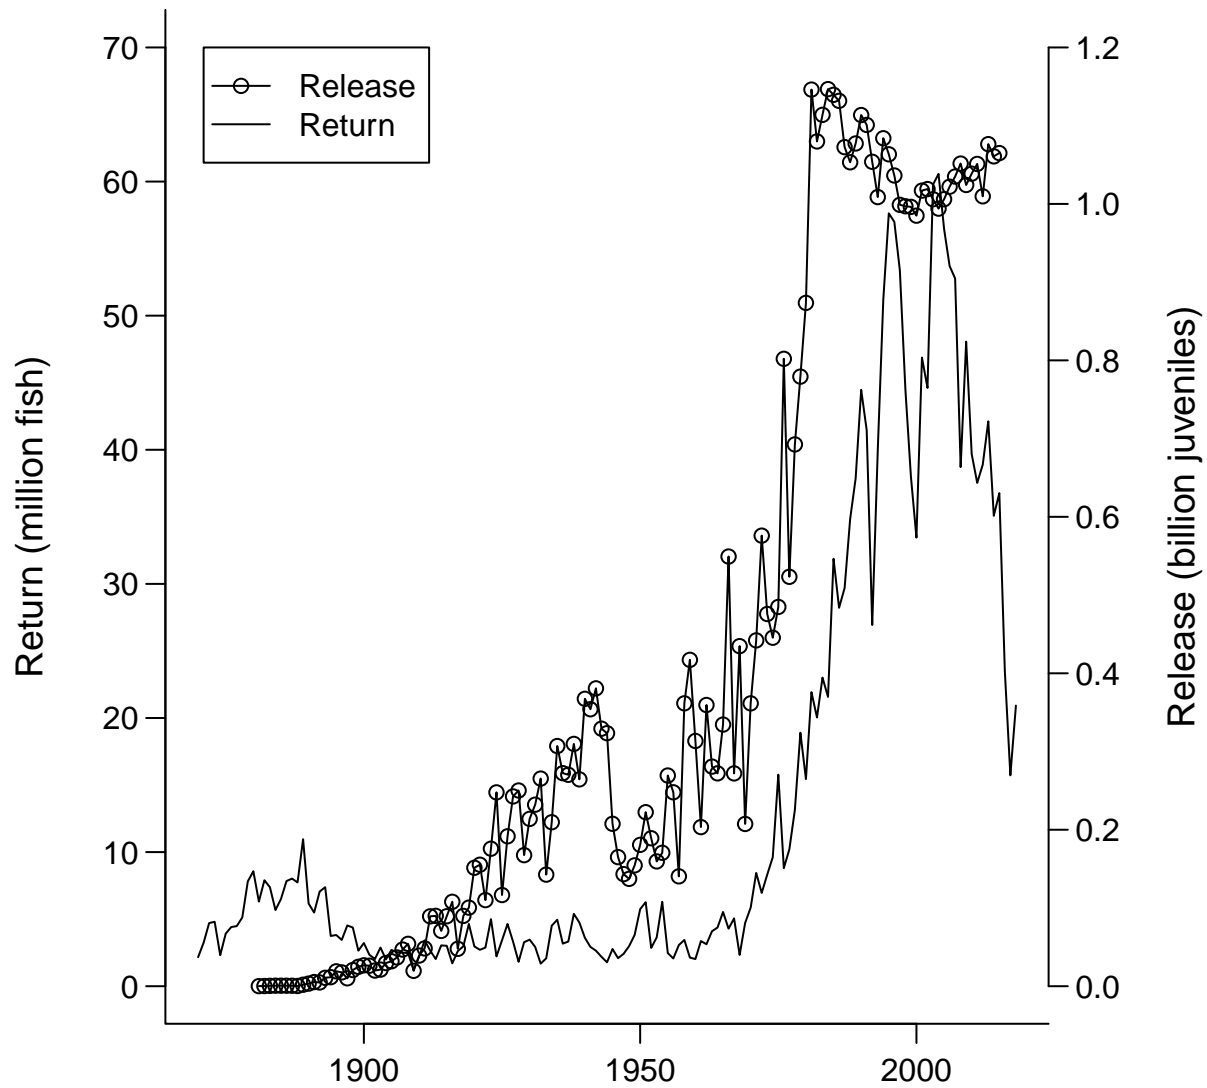

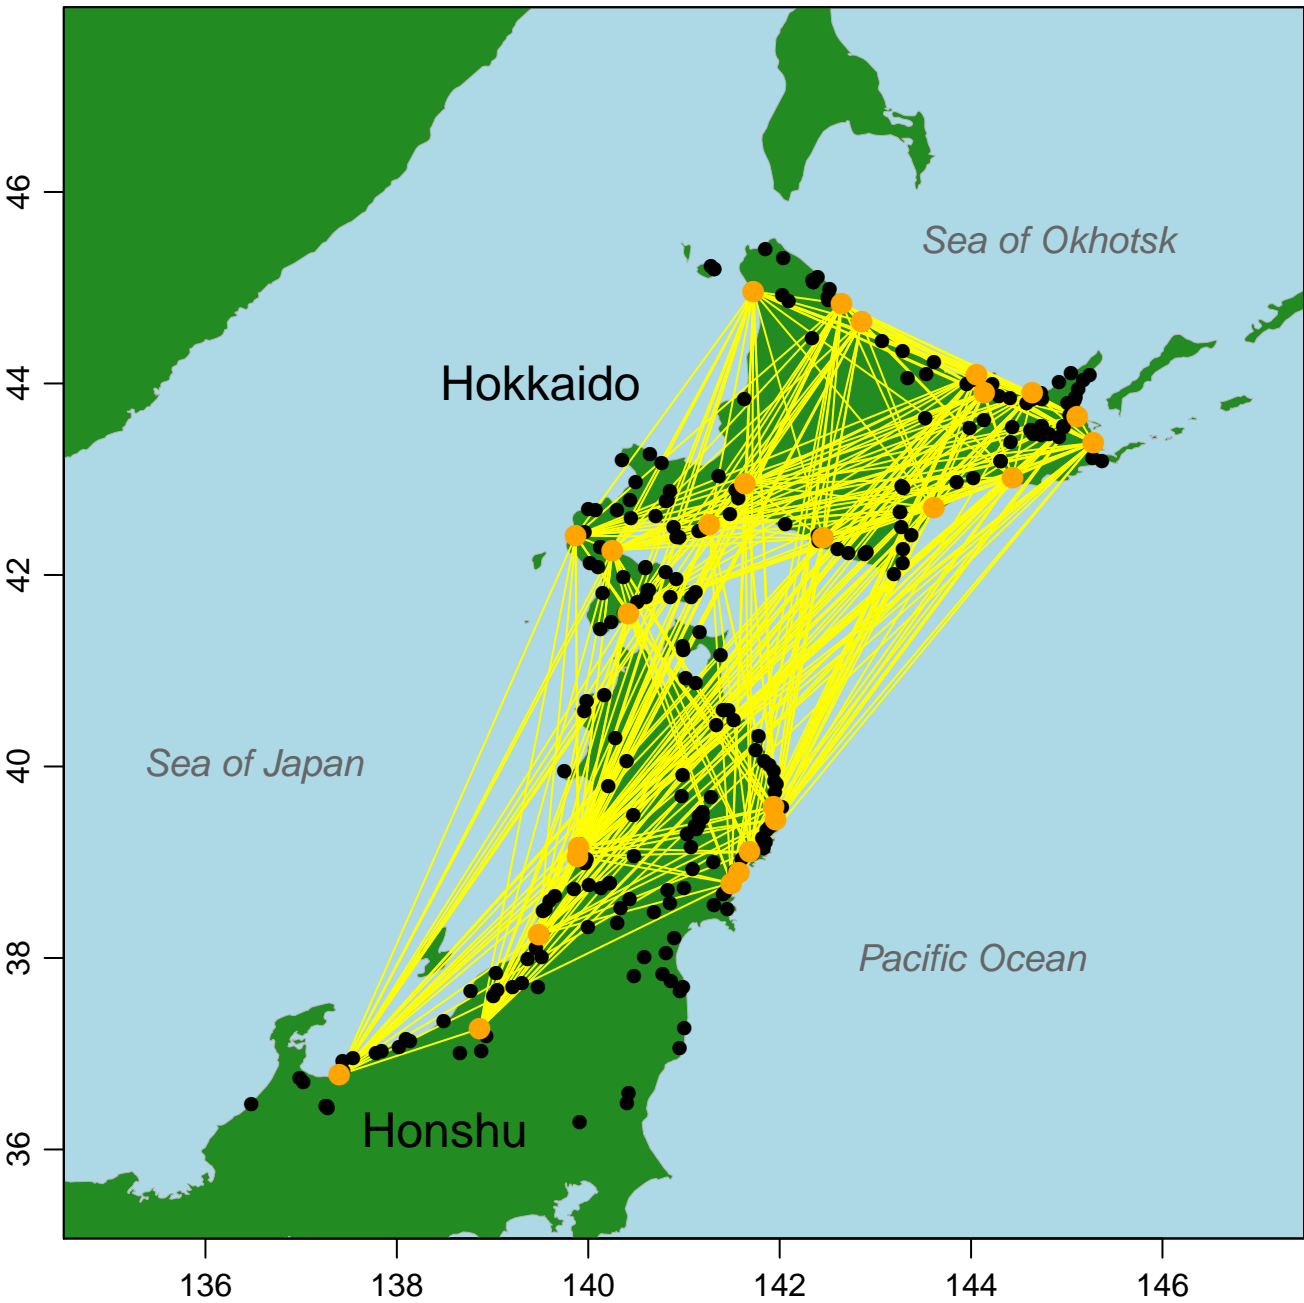

Source: https://www.biorxiv.org/content/10.1101/828798v2.full.pdf
